# Supplementary material for: Intraoperative pharmacologic opioid minimisation strategies and patient-centred outcomes after surgery: a scoping review protocol
Source: PubMed Central journal article supplement — BMJ Open. 2023 Mar 1;13(3):e070748. doi: 10.1136/bmjopen-2022-070748 (PMC9980324; doi:10.1136/bmjopen-2022-070748), 2023-03-01
Supplement: bmjopen-2022-070748.draft_revisions.pdf [file bmjopen-2022-070748.draft_revisions.pdf]

# BMJ Open

BMJ Open is committed to open peer review. As part of this commitment we make the peer review history of every article we publish publicly available.

When an article is published we post the peer reviewers' comments and the authors' responses online. We also post the versions of the paper that were used during peer review. These are the versions that the peer review comments apply to.

The versions of the paper that follow are the versions that were submitted during the peer review process. They are not the versions of record or the final published versions. They should not be cited or distributed as the published version of this manuscript.

BMJ Open is an open access journal and the full, final, typeset and author-corrected version of record of the manuscript is available on our site with no access controls, subscription charges or pay-per-view fees (<http://bmjopen.bmj.com>).

If you have any questions on BMJ Open's open peer review process please email [info.bmjopen@bmj.com](mailto:info.bmjopen@bmj.com)

# BMJ Open

## Intraoperative pharmacologic opioid minimization strategies and patient-centred outcomes after surgery: a scoping review protocol

|                               |                                                                                                                                                                                                                                                                                                                                                                                                                                                                                                                                                                                                                                                                                                                                                                                                                                                                                                                                                                                                                                                                                                                                                                                                                                                                                                                                                                                                                                                                                                                                                                                                                                                                                                                                                                                                                                                                                                                                                                                                                                                                                                                                 |
|-------------------------------|---------------------------------------------------------------------------------------------------------------------------------------------------------------------------------------------------------------------------------------------------------------------------------------------------------------------------------------------------------------------------------------------------------------------------------------------------------------------------------------------------------------------------------------------------------------------------------------------------------------------------------------------------------------------------------------------------------------------------------------------------------------------------------------------------------------------------------------------------------------------------------------------------------------------------------------------------------------------------------------------------------------------------------------------------------------------------------------------------------------------------------------------------------------------------------------------------------------------------------------------------------------------------------------------------------------------------------------------------------------------------------------------------------------------------------------------------------------------------------------------------------------------------------------------------------------------------------------------------------------------------------------------------------------------------------------------------------------------------------------------------------------------------------------------------------------------------------------------------------------------------------------------------------------------------------------------------------------------------------------------------------------------------------------------------------------------------------------------------------------------------------|
| Journal:                      | <i>BMJ Open</i>                                                                                                                                                                                                                                                                                                                                                                                                                                                                                                                                                                                                                                                                                                                                                                                                                                                                                                                                                                                                                                                                                                                                                                                                                                                                                                                                                                                                                                                                                                                                                                                                                                                                                                                                                                                                                                                                                                                                                                                                                                                                                                                 |
| Manuscript ID                 | bmjopen-2022-070748                                                                                                                                                                                                                                                                                                                                                                                                                                                                                                                                                                                                                                                                                                                                                                                                                                                                                                                                                                                                                                                                                                                                                                                                                                                                                                                                                                                                                                                                                                                                                                                                                                                                                                                                                                                                                                                                                                                                                                                                                                                                                                             |
| Article Type:                 | Protocol                                                                                                                                                                                                                                                                                                                                                                                                                                                                                                                                                                                                                                                                                                                                                                                                                                                                                                                                                                                                                                                                                                                                                                                                                                                                                                                                                                                                                                                                                                                                                                                                                                                                                                                                                                                                                                                                                                                                                                                                                                                                                                                        |
| Date Submitted by the Author: | 02-Dec-2022                                                                                                                                                                                                                                                                                                                                                                                                                                                                                                                                                                                                                                                                                                                                                                                                                                                                                                                                                                                                                                                                                                                                                                                                                                                                                                                                                                                                                                                                                                                                                                                                                                                                                                                                                                                                                                                                                                                                                                                                                                                                                                                     |
| Complete List of Authors:     | <p>Verret, Michael; Université Laval, CHU de Québec; Ottawa Hospital Research Institute, Clinical Epidemiology</p> <p>Lam, Nhat Hung; University of Ottawa, Ottawa, Ontario, Canada, Faculty of Medicine</p> <p>Fergusson, Dean; Ottawa Hospital Research Institute, Clinical Epidemiology</p> <p>Nicholls, Stuart ; Ottawa Hospital Research Institute, Clinical Epidemiology</p> <p>Turgeon, Alexis; Centre de Recherche du Centre Hospitalier Affilié Universitaire de Québec (CHA), Axe Traumatologie-urgence-soins intensifs, CHA-Hôpital de l'Enfant-Jésus, Université Laval, Anesthesia and Critical Care Medicine</p> <p>McIsaac, Daniel; The Ottawa Hospital, Anesthesiology and Pain Medicine</p> <p>Gilron, Ian; Queen's University, Anesthesiology</p> <p>Hamtiaux, Myriam; University of Ottawa, Ottawa, Ontario, Canada, Faculty of Medicine</p> <p>Srichandramohan, Sriyathavan; University of Ottawa, Ottawa, Ontario, Canada, Faculty of Medicine</p> <p>Al-Mazidi, Abdulaziz; University of Ottawa, Ottawa, Ontario, Canada, Faculty of Medicine</p> <p>A. Fergusson, Nicholas; University of Calgary, Faculty of Medicine</p> <p>Hutton, Brian; University of Ottawa, Ottawa, Ontario, Canada, ; Ottawa Hospital Research Institute</p> <p>Zivkovic, Fiona; Ottawa Hospital, Patient partner</p> <p>Graham, Megan; Ottawa Hospital, Patient partner</p> <p>Le, Maxime; Ottawa Hospital,</p> <p>Geist, Allison; Ottawa Hospital, Patient partner</p> <p>Berube, Melanie; CHU de Quebec-Université Laval, ; Université Laval, Faculty of Nursing</p> <p>Poulin, Patricia; Ottawa Hospital Research Institute, Clinical Epidemiology</p> <p>Shorr , Risa; Ottawa Hospital, Learning Services</p> <p>Daudt, Helena; Pain Canada</p> <p>Martel, Guillaume; Ottawa Hospital Research Institute, Clinical Epidemiology</p> <p>McVicar, Jason; The Ottawa Hospital, Anesthesiology and Pain Medicine</p> <p>Moloo, Husein; The Ottawa Hospital, Surgery; The Ottawa Hospital Research Institute , Clinical Epidemiology Program</p> <p>Perioperative Anesthesia Clinical Trials Group , Perioperative Anesthesia</p> |

1  
2  
3  
4  
5  
6  
7  
8  
9  
10  
11  
12  
13  
14  
15  
16  
17  
18  
19  
20  
21  
22  
23  
24  
25  
26  
27  
28  
29  
30  
31  
32  
33  
34  
35  
36  
37  
38  
39  
40  
41  
42  
43  
44  
45  
46  
47  
48  
49  
50  
51  
52  
53  
54  
55  
56  
57  
58  
59  
60

|           |                                                                                                                                           |
|-----------|-------------------------------------------------------------------------------------------------------------------------------------------|
|           | Clinical Trials; Perioperative Anesthesia Clinical Trials group<br>Lalu, Manoj; Ottawa Hospital Research Institute, Clinical Epidemiology |
| Keywords: | Pain management < ANAESTHETICS, Adult anaesthesia <<br>ANAESTHETICS, SURGERY, CLINICAL PHARMACOLOGY                                       |
|           |                                                                                                                                           |

SCHOLARONE™  
Manuscripts

## Intraoperative pharmacologic opioid minimization strategies and patient-centred outcomes after surgery: a scoping review protocol

Michael Verret<sup>1,2,5</sup>, Nhat Hung Lam<sup>1,3</sup>, Dean A. Fergusson<sup>1,2,3</sup>, Stuart G. Nicholls<sup>1,6</sup>, Alexis F. Turgeon<sup>4,5</sup>, Daniel I McIsaac<sup>1,2,3</sup>, Ian Gilron<sup>10</sup>, Myriam Hamtiaux<sup>1,3</sup>, Sriyathavan Srichandramohan<sup>1,3</sup>, Abdulaziz Al-Mazidi<sup>1,3</sup>, Nicholas A. Fergusson<sup>11</sup>, Brian Hutton<sup>1</sup>, Fiona Zikovic<sup>9</sup>, Megan Graham<sup>9</sup>, Maxime Le<sup>9</sup>, Allison Geist<sup>9</sup>, Mélanie Bérubé<sup>4,7,8</sup>, Patricia Poulin<sup>1</sup>, Risa Shorr<sup>12</sup>, Helena Daudt<sup>13</sup>, Guillaume Martel<sup>1</sup>, Jason McVicar<sup>1,2</sup>, Husein Moloo<sup>1</sup>, Manoj Lalu<sup>1,2,3</sup> on behalf of the Perioperative Anesthesia Clinical Trials (PACT) group

<sup>1</sup>Clinical Epidemiology Program, Ottawa Hospital Research Institute, Departments of Medicine, Surgery, & School of Epidemiology and Public Health, University of Ottawa OHRI/uOttawa Clinical Epidemiology Program Endowed Chair, Ontario, Canada

<sup>2</sup>Department of Anesthesiology and Pain Medicine, uOttawa, Civic Campus, The Ottawa Hospital, Ontario, Canada

<sup>3</sup>Faculty of Medicine, University of Ottawa, Ontario, Canada

<sup>4</sup>Population Health and Optimal Health Practices Research Unit (Trauma - Emergency - Critical Care Medicine), CHU de Québec - Université Laval Research Center, Québec, Canada

<sup>5</sup>Departments of Anesthesiology and Critical Care Medicine, Faculty of Medicine, Université Laval, Québec, Canada

<sup>6</sup>Ottawa Methods Centre, Ottawa Hospital Research Institute

<sup>7</sup>Faculty of Nursing, 1050 Avenue de la Médecine, Université Laval, Québec City, Quebec, Canada, G1V 0A6

<sup>8</sup>Quebec Pain Research Network, 3001 12e Avenue Nord, Sherbrooke, Quebec, Canada, J1H 5N4

<sup>9</sup>Patient partner, The Ottawa Hospital, Ontario, Canada

<sup>10</sup>Department of Anesthesiology, Queen's University, Kingston, Ontario, Canada

<sup>11</sup>Department of Anesthesiology, Perioperative & Pain Medicine, University of Calgary, Calgary, Alberta, Canada

<sup>12</sup>Library Services, The Ottawa Hospital, Ontario, Canada

<sup>13</sup>Pain Canada, Pain BC, British Columbia, Canada

### Corresponding author

Michael Verret

Clinical Epidemiology Program, Ottawa Hospital Research Institute, 501 Smyth Road, PO Box 201B, Ottawa, Ontario K1H 8L6, Canada.

Phone: 613-737-8899 (x79842)

1  
2  
3  
4  
5  
6  
7  
8  
9  
10  
11  
12  
13  
14  
15  
16  
17  
18  
19  
20  
21  
22  
23  
24  
25  
26  
27  
28  
29  
30  
31  
32  
33  
34  
35  
36  
37  
38  
39  
40  
41  
42  
43  
44  
45  
46  
47  
48  
49  
50  
51  
52  
53  
54  
55  
56  
57  
58  
59  
60

[mverr051@uottawa.ca](mailto:mverr051@uottawa.ca)  
[Michael.verret.med@ssss.gouv.qc.ca](mailto:Michael.verret.med@ssss.gouv.qc.ca)

word count: 2930

**Keywords**

Pain management, Adult anaesthesia, Surgery, Clinical pharmacology

For peer review only

## ABSTRACT

**Introduction:** For close to a century, opioid administration has been a standard of care to complement anesthesia during surgery. Considering the worldwide opioid epidemic, this practice is now being challenged. There is a growing use of systemic pharmacological opioid minimizing strategies to reduce opioid use and potentially improve patient-centred surgical outcomes. Our aim is to conduct a scoping review that will examine clinical trials that have evaluated the impact of intraoperative opioid minimization strategies on patient-centred outcomes and identify promising strategies.

**Methods and Analysis:** Our scoping review will follow the framework developed by Arksey and O'Malley as well as recommendations from the JBI. We will search MEDLINE, EMBASE, CENTRAL, Web of Science, and CINAHL, from their inception without limitation for language of publication. We will include randomized controlled trials, assessing the impact of systemic intraoperative pharmacologic opioid minimization strategies on patient-centred outcomes. We define an opioid minimization strategy as any non-opioid drug with antinociceptive properties administered during the intraoperative period. Patient-centred outcomes will be defined and classified based on the consensus definitions established by the Standardised Endpoints in Perioperative Medicine initiative (StEP-COMPAC group) and informed by knowledge users and patient partners. We will use a co-production approach involving interested parties. Our multidisciplinary team includes knowledge users (surgeons, nurses, anesthesiologists, critical care physicians), patient partners, methodologists and knowledge user organizations. Knowledge users will provide input on methods, outcomes, clinical significance of findings, implementation, and feasibility. Patient partners will participate in assessing the relevance of our design, methods, and outcomes and help to facilitate evidence translation. We will provide a thorough description of available clinical trials, compare their reported patient-centred outcome measures with established recommendations and identify promising strategies.

**Ethics and dissemination:** Our scoping review will inform future research including clinical trials and systematic reviews through identification of important intraoperative interventions.

**Registration:** Open Science Foundation (currently embargoed, [https://osf.io/7kea3/?view\\_only=49946e5dc46c41a59911d247191c9049](https://osf.io/7kea3/?view_only=49946e5dc46c41a59911d247191c9049))

## Article Summary

### Strengths and limitations of this study

- This review will identify existing and promising pharmacologic intraoperative strategies that can be used as alternatives to opioids.
- It will assess outcomes that are meaningful for patients and decision makers in perioperative medicine.
- Interested parties including patients, knowledge user organizations and clinicians will be involved in all the phases of this review.
- Results from this review will inform future research but inferences to directly guide clinical practices will be limited by the lack of risk of bias assessment and the absence of quantitative synthesis of the results.

## INTRODUCTION

Opioid administration is recognized as a standard of care to complement general anesthesia in order to reduce pain and maintain overall physiological stability (heart rate, blood pressure, metabolic) during surgery.<sup>1</sup> However potential disadvantages of opioids (ie. risk of tolerance, nausea, confusion, dependence, etc.),<sup>2-20</sup> as well as the worldwide opioid crisis, have led to a re-evaluation of their routine intraoperative use.<sup>21</sup> Multiple national and international societies<sup>22-23</sup> have advised that opioid minimization strategies (eg. pharmacologic opioid alternatives) be developed and carefully assessed using a patient-oriented approach. In addition, intraoperative opioid minimization strategies and practices have been identified as patient and caregiver priorities by the recent James Lind Alliance-led Canadian Anesthesia Research Priority Setting Partnership exercise.<sup>24</sup>

Over the last two decades, more than twenty non-opioid alternative strategies have been developed to complement general anesthesia, with most being used “off-label” (ie. use of drug for an indication that has not been approved by regulatory agencies for this specific purpose).<sup>25</sup> Of note, pharmacologic opioid minimization strategies during the intraoperative period are being adopted despite limited evidence to inform best practice and with large variation in practices.<sup>25-27</sup> While the results of previous reviews and randomized controlled trials (RCTs) suggest that opioid alternatives can reduce short-term opioid use during and after surgery, they have focused primarily on the effect of pharmacologic opioid minimizing strategies on surrogate outcome measures, such as short-term quantity of opioids administered, hemodynamic stability, or unidimensional instruments (eg. pain intensity assessment).<sup>6-18 28-46</sup> There is a paucity of evidence regarding the impact of opioid minimization strategies on long-term opioid use and outcomes that are the most meaningful to patients. Importantly, patients were not engaged or consulted on their preferences in previous reviews. Thus, while some pharmacologic strategies have been identified as potentially beneficial, a global perspective that maps all potential pharmacologic opioid alternatives during the intraoperative period, including their potential impact on clinically relevant outcomes most meaningful to patients, is noticeably lacking.<sup>28-34</sup> Further, there is a need to integrate guidance provided by the Standardised Endpoints in Perioperative Medicine initiative (StEP-COMPAC), a group that established recommendations



1  
2  
3 for patient-centred outcome measures to be assessed in perioperative trials to better inform future  
4 research and priorities.<sup>47</sup>  
5  
6  
7

8 To address this knowledge gap, we have assembled a multidisciplinary team of knowledge users,  
9 a patient panel, clinicians, policy makers, trainees and methodologists, to conduct a patient-  
10 oriented scoping review to examine the current evidence of RCTs assessing intraoperative  
11 pharmacologic opioid minimization strategies. Our primary aim is to map and characterize the  
12 RCT evidence assessing the patient-centred effectiveness of pharmacologic intraoperative opioid  
13 minimization strategies in adult surgical patients. This will include a description of the  
14 pharmacologic strategies assessed and identification of promising pharmacologic strategies. Our  
15 secondary aim is to synthesize the reported patient-centred outcomes in RCTs evaluating  
16 pharmacologic intraoperative opioid minimization strategies by mapping and characterizing the  
17 trial reported outcomes.  
18  
19  
20  
21  
22  
23  
24  
25  
26

## 27 **METHODS AND ANALYSIS**

### 28 **Review question**

29  
30 Our main research question aims to identify and describe pharmacologic opioid minimization  
31 strategies for use during the intraoperative period that are tailored to the needs of surgical  
32 patients undergoing general anesthesia. We have defined our eligibility criteria according to the  
33 Participant, Concept and Context, and Source (PCCS) framework.<sup>48</sup> The eligibility criteria have  
34 been informed through discussions with interested parties including patient partners. Important  
35 definitions are detailed in Appendix 1.  
36  
37  
38  
39  
40  
41  
42

### 43 **Design**

44 Our scoping review will follow best practices including the methodological framework  
45 developed by Arksey and O'Malley<sup>49 50 51</sup> and recommendations from the Joanna Briggs  
46 Institute (JBI).<sup>48</sup> We have chosen a scoping review design over other approaches to knowledge  
47 synthesis considering the large number of strategies available, the complexity of the field, as well  
48 as established recommendations for choosing the most appropriate knowledge synthesis research  
49 design.<sup>52 53</sup> Our protocol is reported in accordance with JBI guidance,<sup>54 55</sup> and our final review  
50 will be reported following the Preferred Reporting Items for Systematic Reviews and Meta-  
51  
52  
53  
54  
55  
56  
57  
58  
59  
60

Analyses (PRISMA) Extension for Scoping Review guidelines.<sup>56</sup> We will be using the Guidance for Reporting Involvement of Patients and Public (GRIPP2) checklist to report patient involvement in our review.<sup>57</sup> Our study is registered with the Open Science Foundation and all modifications will be posted.

## Eligibility criteria

### Participants

Our target population will be adult ( $\geq 18$  years old) surgical patients considering significant differences for patient-centred outcome measures between adult and children. We will include studies involving any type of surgery (elective vs. emergent, cardiac vs. non-cardiac) and any surgical patient population (opioid naïve, opioid user, parturient, etc.) undergoing general anesthesia. The total sample size will need to be at least 30 participants considering statistical and clinical limitations of small sample size studies for pragmatism research question.

### Concept

We will include RCTs and cluster RCTs assessing the impact of a systemic intraoperative pharmacologic opioid minimization strategy compared with one or more control groups consisting of systemic opioids, routine care, or systemic placebo on patient-centred outcomes (see Appendix 1 for definitions). A systemic opioid minimization strategy is defined as any non-opioid drug with anti-nociceptive properties administered orally, or using intramuscular, subcutaneous or intravenous injection during the intraoperative period (see appendix 2 for the list of classes of drugs included).<sup>13</sup> The intervention must be started during the intraoperative period, and there is no limitation for the duration of the intervention.

### Context

At least one patient-centred outcome must be assessed and reported in the study based on StEP-COMPAC recommendations (well-being, functional outcomes, patient satisfaction, quality of life, and life impact).<sup>47</sup> Any instruments that could be categorized in one of these domains will be included. Based on discussions with patient partners, we will also include within the scope of patient-centred outcomes long-term opioid use ( $\geq 1$  month), opioid-related adverse effects (multidimensional assessment), acute pain (multidimensional assessment,  $< 3$  months), and

1  
2  
3 postoperative chronic pain ( $\geq 3$  months).<sup>24</sup> Studies assessing patient-centred outcome measures  
4 only during the time in recovery room will not be included as this time point was judged to be  
5 less meaningful by both the patient partners and knowledge users.  
6  
7  
8  
9

### 10 **Information sources**

11 We will only include RCTs as it is the gold standard study design to address the potential effect  
12 of an intervention. We anticipate to retrieve a large number of RCTs meeting our eligibility  
13 criteria. Only articles published in peer-reviewed journals will be included.  
14  
15  
16  
17

### 18 **Search strategy**

19 Our search strategy was developed using a three-step approach in collaboration with method  
20 experts, patients, anesthesiologists, surgeons, pain experts and an information specialist.<sup>48</sup> Key  
21 terms to be included were informed by discussion with our stakeholder group (Appendix 3).  
22 First, we ran the pilot search strategy (Appendix 4) in two databases (MEDLINE and CINAHL).  
23 This search strategy was developed following the Peer Review of Electronic Search Strategies  
24 (PRESS) recommendations and it was peer-reviewed independently by one information  
25 specialist.<sup>58</sup> Text terms contained in the title and abstract of relevant citations as well as index  
26 terms were collected based on our pilot search strategy. Second, we added those text terms and  
27 index terms to the search strategy, which we then ran through MEDLINE, EMBASE,  
28 CENTRAL, Web of Science, and CINAHL from inception. To ensure the sensitivity of the  
29 search strategy, we verified that the strategy returned a set of 25 pre-identified RCT publications  
30 meeting our eligibility criteria. We did not limit language of publication and we plan to translate  
31 relevant studies using DeepL (<https://www.deepl.com/translator>).<sup>59 60</sup>  
32  
33  
34  
35  
36  
37  
38  
39  
40  
41  
42  
43  
44  
45  
46  
47  
48  
49  
50  
51  
52  
53  
54  
55  
56  
57  
58  
59  
60

## Study records

### *Data management*

Applicability, reproducibility and impact will be increased by following the Canadian Roadmap for Open Science (registering the review, publishing the protocol, accessible and reproducible data and results, etc.).<sup>61</sup> Any deviations from our protocol will be noted, with rationale, in the completed review and on our Open Science Framework project file.

### *Selection process*

Screening will be performed in two stages. In Stage 1 we will screen titles & abstracts identified by the search strategy, followed in Stage 2 by the screening of the full-text articles which were deemed potentially relevant or of uncertain relevance during Stage 1 screening. The screening will be performed independently by two reviewers, and disagreements resolved with a third reviewer when necessary. We will use Distiller SR (a cloud-based, audit ready software for knowledge synthesis) to collect citations, remove duplicates, and screen titles and abstracts (stage 1).<sup>62</sup> Outcome measure relevance (at least one patient-centred outcome) will be used as an inclusion criterion at full-text screening only (Stage 2) and not during title and abstract screening, as this information is believed to be incompletely reported in the abstract. We will collect reasons for exclusions at the full-text screening stage. We will conduct pilot testing of the screening process on a set of 100 random citations for the title and abstract screening. We will report the results of the search and the study inclusion process in the manuscript reporting the results in a Preferred Reporting Items for Systematic Reviews and Meta-analyses extension for scoping review (PRISMA-ScR) flow diagram.<sup>56</sup>

We will integrate innovative strategies to increase the efficiency of the screening process considering the large number of expected citations and trials.<sup>63</sup> For stage 1, we will use Distiller SR's artificial intelligence (AI) active-machine learning feature to prioritize title and abstract screening of citations.<sup>64</sup><sup>65</sup> This method has been validated.<sup>65</sup> This active-machine learning feature will allow us to perform prioritized screening, as a relevance score will be generated for each citation during an initial training exercise on a sample of approximately 200 citations; this feature will continue to learn throughout the stage 1 screening process, presenting reviewers with

1  
2  
3 the most relevant citations first. Once we have reached a predicted recall rate of 90% (meaning  
4 that the active machine learning predicts we will have identified approximately 90% of included  
5 RCTs), the AI tool will replace one of the reviewers in our duplicate screening process, and will  
6 be instructed to exclude all remaining citations. These citations will still be inspected by a human  
7 reviewer, and when there is a disagreement for a citation between the reviewer and the AI tool, a  
8 second human reviewer will participate to reach consensus. We will conduct ongoing conflict  
9 resolution throughout stage 1 screening to maintain strong performance of the AI tool. For full  
10 text screening (stage 2), we will use the insightScope platform ([www.insightscope.ca](http://www.insightscope.ca)), a web-  
11 based application that allows creation of a large online team to facilitate screening.<sup>66</sup> Prior to  
12 beginning full text screening, each incoming reviewer will need to complete a test set (n=50  
13 citations) and achieve at least 80% sensitivity for included articles compared with a gold  
14 standard. The gold standard will be established a priori by two expert reviewers.

#### 25 *Data collection process*

26 We reviewed important concepts to be included in data charting with our patient panel and our  
27 knowledge users (Appendix 3, Steering committee and Stakeholder group) and developed a draft  
28 data abstraction form with our patient panel, methodological and clinical experts. It will be pilot  
29 tested by two reviewers using a sample of five reports, prior to initiation of data collection for the  
30 full set of included studies. Two reviewers will abstract the data independently using a  
31 standardized data extraction form in the insightScope platform.<sup>67</sup> Authors will be contacted if  
32 relevant data or information is missing.

#### 41 *Data items*

42 To address our primary aim of characterizing the RCT evidence assessing pharmacologic  
43 intraoperative opioid minimization strategies and identify promising strategies, we will extract  
44 data on the publication (author, year of publication, country), the intervention; including the  
45 category of opioid minimization strategy (N-Methyl-D-aspartate receptor antagonists,  
46 anticonvulsant, acetaminophen, corticosteroids, alpha-2 adrenergic agonists, beta-adrenergic  
47 antagonists, and other),<sup>68 69</sup> whether the intervention involved multiple medications  
48 (combination) vs. only one medication, the timing of administration (intraoperative vs.  
49 intraoperative and postoperative period), and the reported patient-centred outcome measures

1  
2  
3 (domains and instruments). Other data to be extracted will include the type of randomization  
4 (group unit vs. individual unit) and method (type of comparator, type of surgery, multicentre vs.  
5 one centre, registered protocol, sample size, adverse events reported, funding source, sex, gender  
6 and genetic considerations), study population characteristics (age group, opioid use or chronic  
7 pain history), as well as implementation barriers previously identified, such as the mode of  
8 administration of the pharmacologic strategy.<sup>70</sup>  
9  
10  
11  
12  
13  
14

15 To address our secondary aim of synthesizing the reported patient-centred outcomes, we will  
16 categorize each patient-centred outcome measure according to the Standardised Endpoints in  
17 Perioperative Medicine initiative (StEP-COMPAC group perioperative framework) domains (i.e.  
18 well-being, functional outcomes, patient satisfaction, quality of life, and life impact).<sup>71</sup> We will  
19 also capture long-term opioid use, opioid-related adverse effects (multidimensional assessment),  
20 acute pain (multidimensional assessment), and postoperative chronic pain separately.<sup>72 73</sup>  
21  
22  
23  
24  
25  
26

### 27 **Data synthesis and outcome prioritization**

  
28

29 The analysis of our primary aim of characterizing the RCT evidence assessing patient-centred  
30 effectiveness of pharmacologic intraoperative opioid minimization strategies will be descriptive  
31 and will include the use of summary figures, tables, and charts. First, we will collate and present  
32 in tables the number of RCTs assessing each pharmacologic opioid minimization strategy  
33 identified, as well as important methods and design characteristics of those RCTs. Second, we  
34 will further describe the pharmacologic opioid minimization strategies; including the category of  
35 pharmacologic agent involved, the timing of administration of the intervention, and the number  
36 of pharmacologic agents involved in each strategy. We will report the number of trials (bubble  
37 size) assessing each class of opioid minimization strategies (y-axis) as a function of the reported  
38 domain of patient-centred outcome (x-axis) using bubble plots. Third, we will characterize the  
39 significance of the patient-centred results from each of the RCTs. More specifically, we will  
40 classify each RCT and its pharmacologic opioid minimization strategy as being beneficial (eg.  
41 promising), equivocal, not effective, or potentially deleterious based on patient-centred outcomes  
42 reported and author's conclusion.<sup>74</sup> In cases of inconsistency in results, we will hold nominal  
43 group discussions with our identified interested parties (Appendix 3, Steering committee) to  
44 determine which pharmacologic strategies are the most promising.<sup>75</sup> Our a priori prioritization of  
45  
46  
47  
48  
49  
50  
51  
52  
53  
54  
55  
56  
57  
58  
59  
60

patient-centred outcome measure instruments will help guide reporting and interpreting of findings (Table 1).<sup>76 77</sup>

**Table 1. StEP-COMPAC group recommendations for patient-centred outcome assessments in perioperative clinical trials<sup>47</sup> and our prioritization order tailored to pharmacologic interventions**

|                                                                           | Patient-centred outcome domains      |                                                                                  |                                                              |                                                  |                                                                                                  |
|---------------------------------------------------------------------------|--------------------------------------|----------------------------------------------------------------------------------|--------------------------------------------------------------|--------------------------------------------------|--------------------------------------------------------------------------------------------------|
|                                                                           | Patient well-being                   | Health-related quality of life                                                   | Functional outcome                                           | Patient satisfaction                             | Life impact                                                                                      |
| <b>Instruments to be prioritized based on StEP-COMPAC recommendations</b> | Quality of recovery-15 <sup>78</sup> | EuroQol 5 Dimension, five-level version with visual analogue scale <sup>79</sup> | WHO Disability Assessment Schedule version 2.0 <sup>80</sup> | Bauer patient-satisfaction measure <sup>81</sup> | Days alive and out of hospital after surgery (at 30 days and one year) and discharge destination |
| <b>Prioritization by our team (Steering committee)<sup>1</sup></b>        | 1                                    | 2                                                                                | 3                                                            | 4                                                | 5                                                                                                |

<sup>1</sup>Prioritization based on a) Plausibility for effect between intraoperative pharmacologic intervention and outcome b) Patient and knowledge user priority

For our secondary aim of synthesising reported patient-centred outcomes in RCTs evaluating pharmacologic intraoperative opioid minimization strategies, we will categorize RCTs based on 7 outcome domains (five from StEOP-COMPAC initiative and two from our Steering committee), namely: well-being, functional outcomes, patient satisfaction, quality of life, life impact, opioid-related (long-term opioid use and multidimensional assessment of opioid-related

1  
2  
3 adverse effects), and pain-related (multidimensional acute pain, and postoperative chronic pain).  
4 We will present results for individual RCTs and the number of RCTs that reported each outcome  
5 measure classified by domain. We will report the proportion of published RCTs that reported on  
6 instruments deemed to be important by the StEP-COMPAC group recommendations (Table 1).  
7 We will also report if sex, gender and genetic were accounted for in the analyses and outcome  
8 assessments.<sup>70</sup>  
9  
10  
11  
12  
13  
14

### 15 **Patient and public involvement**

16 Recognizing the need to have the patient voice on the investigative team, our study team includes  
17 a patient panel of four individuals with lived perioperative experience. For this collaborative  
18 work, we are following the principles laid out in the Strategy for Patient-Oriented Research  
19 (SPOR) Patient Engagement Framework which aims at optimizing collaborative partnerships  
20 between researchers and lay people or organizations.<sup>82</sup> In line with these principles of  
21 inclusiveness, support, mutual respect, and co-building, we (the patient panel and research leads)  
22 have met numerous times. Each meeting is co-led with a patient-oriented research facilitator  
23 (Nicholls), and we are using first names to facilitate communication and reduce power  
24 imbalance. We have also co-developed terms of reference for the patient panel to inform and  
25 guide the ongoing engagement (<https://osf.io/afm3z/>). Our patient engagement approach and  
26 work are described in another publication (manuscript accepted, publication pending).  
27  
28  
29  
30  
31  
32  
33  
34  
35  
36  
37

38 To date, we have developed the protocol through discussions and written comments, including  
39 assessment of the relevance of the scope of the review, the outcomes, the plain language abstract,  
40 the planned items for extraction and national grant application. We anticipate ongoing  
41 collaboration to assist with the prioritization of outcomes and interventions as well as  
42 interpretation of results and facilitating evidence translation and dissemination of our findings  
43 (interaction with other interested parties, co-developing an abstract, advertisements on social  
44 media, etc.). We have sought to build strong and sustainable relationships through transparency  
45 (mutual goals agreed on), commitment, regular communication and feedback (email updates,  
46 group discussion), and ongoing evaluation (Public and Patient Engagement Evaluation tool  
47 [PPEET] survey administered to ensure satisfaction and obtain feedback).<sup>83</sup>  
48  
49  
50  
51  
52  
53  
54  
55  
56  
57  
58  
59  
60



1  
2  
3 We are also engaging several organizations as knowledge users, namely: SolvingPain  
4 (<https://www.solvingpain.ca>), Pain BC (<https://painbc.ca>), Health Canada  
5 (<https://www.canada.ca/en/health-canada.html>), Réseau Québécois de Recherche sur la Douleur  
6 (<https://qprn.ca/fr/>), Choosing Wisely (<https://choosingwiselycanada.org>), Strategy for Patient-  
7 Oriented Research (<https://ossu.ca>), the Canadian Anesthesia Society  
8 (<https://www.cas.ca/en/home>) and the Canadian Chronic Pain Network  
9 (<https://cpn.mcmaster.ca>). We have defined roles of our knowledge user organizations following  
10 a presentation and discussion with each of them as well as through a survey sent to each  
11 organization. Our scoping review is developed with the Canadian Perioperative Anesthesia  
12 Clinical Trials (PACT) group (<https://canadianpact.ca>), a collaborative research network in  
13 anesthesiology and perioperative care.  
14  
15  
16  
17  
18  
19  
20  
21  
22  
23

## 24 **Conclusion**

25 Our scoping review will help identify knowledge gaps to be addressed to inform clinical practice  
26 guidelines and future research regarding intraoperative opioid minimization strategies.  
27 Specifically, it will help identify promising opioid minimization strategies that warrant  
28 systematic reviews and future clinical trials. Although influential international perioperative  
29 guidelines such as the *Enhanced Recovery After Surgery guideline* do encourage perioperative  
30 opioid minimization strategies in general,<sup>84-86</sup> recommendations specifically regarding the  
31 intraoperative period are non-existent.<sup>87</sup> Lastly, we will identify whether important patient-  
32 centred outcomes are underrepresented in published trials, which will guide future research for  
33 improving patient-oriented research and, ultimately, clinical care.  
34  
35  
36  
37  
38  
39  
40  
41  
42

## 43 **ETHICS AND DISSEMINATION**

44 Our review does not require research ethics committee approval. To increase dissemination, our  
45 final manuscript reporting the results will be submitted for publication in open access, peer-  
46 reviewed journals. We will work with our knowledge user organizations and their networks to  
47 facilitate dissemination through websites, conference presentations, and social media platforms.  
48  
49  
50  
51  
52

## 53 **Acknowledgements**

1  
2  
3 We would like to thank Mrs. Risa Shorr (Information specialist at the Université of Ottawa) and  
4 M. Frederic Bergeron (information specialist at Université Laval) for their help in the  
5 development of the search strategy as well as all our knowledge user collaborators, namely:  
6 SolvingPain (<https://www.solvingpain.ca>), Pain BC (<https://painbc.ca>), Health Canada  
7 (<https://www.canada.ca/en/health-canada.html>), Réseau Québécois de Recherche sur la Douleur  
8 (<https://qprn.ca/fr/>), Choosing Wisely (<https://choosingwiselycanada.org>), Strategy for Patient-  
9 Oriented Research (<https://ossu.ca>), the Canadian Anesthesia Society  
10 (<https://www.cas.ca/en/home>), the Canadian Chronic Pain Network (<https://cpn.mcmaster.ca>), as  
11 well as the Canadian Perioperative Anesthesia Clinical Trials group (<https://canadianpact.ca> )  
12 for their help in refining the research question, their input on the design of the study as well as  
13 developing the dissemination plan.  
14  
15  
16  
17  
18  
19  
20  
21  
22  
23  
24  
25  
26  
27  
28  
29  
30  
31  
32  
33  
34  
35  
36  
37  
38  
39  
40  
41  
42  
43  
44  
45  
46  
47  
48  
49  
50  
51  
52  
53  
54  
55  
56  
57  
58  
59  
60

## Appendix 1. Definitions

Intraoperative period: The moment between patient entrance in the operating room (OR) and the moment they leave the operating room. For our research program, pharmacologic interventions administered the same day of surgery and before patient's extubation will be considered as intraoperative based on mechanism of action and effect duration properties.

Intraoperative opioid minimization strategy: Any non-opioid drug with antinociceptive properties administered during the intraoperative period.

Intraoperative opioid-free anesthesia: A type of opioid minimization strategy with complete avoidance of opioids during surgery.

Multimodal strategies: The use of different classes of drugs, combining different action mechanisms aiming to reduce adverse effects and improving benefits.

Patient centred outcome domains: well-being, functional outcomes, patient satisfaction, quality of life, life impact, opioid-related, and pain-related.

Perioperative opioid free analgesia: A type of opioid minimization strategy with complete avoidance of opioids for pain management.

Systemic administration: Oral, intravenous, intramuscular or subcutaneous administration.

**Appendix 2. List of class of drugs included and specific pharmacologic opioid minimization strategies examples**

| <b>Class of drugs</b>         | <b>Examples</b>                                                                                    |
|-------------------------------|----------------------------------------------------------------------------------------------------|
| Anticonvulsants               | Pregabalin<br>Gabapentin<br>Carbamazepine                                                          |
| Beta-adrenergic antagonist    | Esmolol<br>Metoprolol<br>Labetolol                                                                 |
| Alpha-2 receptor agonist      | Clonidine<br>Dexmedetomidine                                                                       |
| Methylxanthine                | Caffeine                                                                                           |
| NMDA Receptor Antagonists     | Ketamine<br>Dextromethorphan<br>Magnesium                                                          |
| Corticosteroid/Glucocorticoid | Dexamethasone<br>Methylprednisolone<br>Hydrocortisone<br>Prednisone                                |
| Antidepressants               | Amitriptyline<br>Duloxetine<br>Tryptophan<br>Bicifadine<br>Fluoxetine<br>Venlafaxine<br>Citalopram |
| Local Anesthetic              | Lidocaine                                                                                          |
| Anti-inflammatory (non-NSAID) | Acetaminophen<br>Nefopam<br>Metamizol                                                              |
| Non opioid central analgesic  | Acetaminophen<br>Nefopam                                                                           |
| Amprone                       | Metamizole                                                                                         |

|                                      |                                                                                                        |
|--------------------------------------|--------------------------------------------------------------------------------------------------------|
| Nonsteroidal Anti-inflammatory Drugs | Aspirin<br>Ketorolac<br>Diclofenac<br>Naproxen<br>Ibuprofen<br>Nabumetone<br>Indomethacin<br>Piroxicam |
| COX-2 specific inhibitor (COXIB)     | Celecoxib<br>Rofecoxib<br>Valdecoxib<br>Etoricoxib<br>Lumiracoxib                                      |
| Cannabinoid                          | Nabilone<br>Cannabidiol                                                                                |

### Appendix 3. Interested parties

| Type of knowledge user                   | Interested parties identified                                                                   | Role in our scoping review               |
|------------------------------------------|-------------------------------------------------------------------------------------------------|------------------------------------------|
| Practitioners and researchers            | Anesthesiologists<br>Surgeons<br>Nurses<br>Pain expert<br>Psychologist<br>Researcher<br>Trainee | Steering committee and stakeholder group |
| Patients                                 | Patient panel                                                                                   | Steering committee and stakeholder group |
| Patient organization                     | Strategy for Patient-Oriented Research (SPOR)                                                   | Stakeholder group                        |
| Policy makers                            | Health Canada<br>Choosing Wisely                                                                | Stakeholder group                        |
| Institutions                             | Department of Anesthesia and Pain Medicine (University of Ottawa)                               | Stakeholder group                        |
| Interdisciplinary organization           | Pain BC<br>Solving Pain<br>Réseau Québécois de Recherche sur la Douleur<br>Chronic Pain Network | Stakeholder group                        |
| Researcher and practitioner organization | Perioperative Anesthesia<br>Clinical Trials group<br>Canadian Anesthesia Society                | Stakeholder group                        |

1  
2  
3  
4  
5  
6  
7  
8  
9  
10  
11  
12  
13  
14  
15  
16  
17  
18  
19  
20  
21  
22  
23  
24  
25  
26  
27  
28  
29  
30  
31  
32  
33  
34  
35  
36  
37  
38  
39  
40  
41  
42  
43  
44  
45  
46  
47  
48  
49  
50  
51  
52  
53  
54  
55  
56  
57  
58  
59  
60

For peer review only

#### Appendix 4. Search strategy for MEDLINE/Ovid

1 exp Surgical Procedures, Operative/  
 2 su.fs. or (surger\* or surgical\*).tw,kf.  
 3 (curettage or debridement or electrosurger\* or fasciotom\* or Keratectom\* or laparotom\*  
 4 or lymph node excision or mastectom\* or metastasectom\* or microsurger\* or myotom\* or  
 5 neurosurgical procedure\* or orthopedic procedure\* or amputation or Osteotom\* or pelvic  
 6 exenteration or pneumonectom\* or prosthesis implantation or reoperation or splenectom\* or  
 7 symphysiotom\* or transplantation).tw,kf.  
 8 or/1-3  
 9 ((opioid\* or opiate\*) adj3 (sparing or minimi?ation or free)).tw,kf.  
 10 (multimodal adj5 (an?esthes\* or analges\*)).tw,kf.  
 11 5 or 6  
 12 analgesics/ or exp analgesics, non-narcotic/  
 13 exp Adrenergic alpha-2 Receptor Agonists/  
 14 Caffeine/  
 15 exp anti-inflammatory agents/  
 16 exp Adrenal Cortex Hormones/  
 17 exp Cyclooxygenase 2 Inhibitors/  
 18 exp Adrenergic beta-Antagonists/  
 19 Receptors, N-Methyl-D-Aspartate/ai [Antagonists & Inhibitors]  
 20 magnesium compounds/ or magnesium sulfate/  
 21 exp Anticonvulsants/  
 22 (Lidocaine or Alpha-2 Receptor Agonist\* or Caffeine or Corticosteroid\* or Beta block\*  
 23 or NMDA receptor antagonist\* or Magnesium or Acetaminophen or NSAID\* or Anti-  
 24 convulsant\* or anticonvulsant\* or Antidepressant\* or gabapentinoid\* or cox-2 inhibitor\*).tw,kf.  
 25 Dexmedetomidine/ or lidocaine/ or ketamine/ or Propranolamines/ or Clonidine/  
 26 (Pregabalin or Gabapentin or Carbamazepine or Carbazepin or Esmolol or  
 27 Propranolamine\* or Metoprolol or Labetolol or Clonidine or Dexmedetomidine or Catapressan or  
 28 Caffeine or Ketamine or Dextromethorphan or Dexamethasone or Methylprednisolone or  
 29 hydrocortison\* or Prednisone or magnesium or Amitriptyline or Duloxetine or Tryptophan or  
 30 Bicifadine or Desipramine or fluoxetine or Venlafaxine or Citalopram).ti.  
 31 or/8-20  
 32 perioperative period/ or intraoperative period/ or exp Administration, Intravenous/ or  
 33 Combined Modality Therapy/  
 34 (perioperat\* or peri operat\* or intra operat\* or intraoperat\*).tw,kf.  
 35 (an?esthes\* adj2 induction).tw,kf.  
 36 or/22-24  
 37 21 and 25  
 38 7 or 26  
 39 4 and 27  
 40 randomized controlled trial.pt.  
 41 controlled clinical trial.pt.  
 42 random\*.tw.  
 43 placebo.ab.



1  
2  
3 33 clinical trials as topic.sh.  
4 34 trial.ti.  
5 35 or/29-34  
6 36 exp animals/ not humans/  
7 37 35 not 36  
8 38 28 and 37  
9 39 38 use medall  
10  
11  
12  
13  
14  
15  
16  
17  
18  
19  
20  
21  
22  
23  
24  
25  
26  
27  
28  
29  
30  
31  
32  
33  
34  
35  
36  
37  
38  
39  
40  
41  
42  
43  
44  
45  
46  
47  
48  
49  
50  
51  
52  
53  
54  
55  
56  
57  
58  
59  
60

For peer review only

## References

1. Shanthanna H, Ladha KS, Kehlet H, et al. Perioperative Opioid Administration: A Critical Review of Opioid-free versus Opioid-sparing Approaches. *Anesthesiology* 2020 doi: 10.1097/ALN.0000000000003572
2. Benyamin R, Trescot AM, Datta S, et al. Opioid complications and side effects. *Pain Physician* 2008;11(2 Suppl):S105-20. [published Online First: 2008/06/17]
3. Chia YY, Liu K, Wang JJ, et al. Intraoperative high dose fentanyl induces postoperative fentanyl tolerance. *Can J Anaesth* 1999;46(9):872-7. doi: 10.1007/bf03012978 [published Online First: 1999/09/18]
4. Joly V, Richebe P, Guignard B, et al. Remifentanyl-induced postoperative hyperalgesia and its prevention with small-dose ketamine. *Anesthesiology* 2005;103(1):147-55. doi: 10.1097/00000542-200507000-00022 [published Online First: 2005/06/29]
5. Long DR, Lihn AL, Friedrich S, et al. Association between intraoperative opioid administration and 30-day readmission: a pre-specified analysis of registry data from a healthcare network in New England. *Br J Anaesth* 2018;120(5):1090-102. doi: 10.1016/j.bja.2017.12.044 [published Online First: 2018/04/18]
6. Abola RE, Bennett-Guerrero E, Kent ML, et al. American Society for Enhanced Recovery and Perioperative Quality Initiative Joint Consensus Statement on Patient-Reported Outcomes in an Enhanced Recovery Pathway. *Anesth Analg* 2018;126(6):1874-82. doi: 10.1213/ane.0000000000002758 [published Online First: 2018/01/03]
7. Myles PS, Boney O, Botti M, et al. Systematic review and consensus definitions for the Standardised Endpoints in Perioperative Medicine (StEP) initiative: patient comfort. *Br J Anaesth* 2018;120(4):705-11. doi: 10.1016/j.bja.2017.12.037 [published Online First: 2018/03/27]
8. Wijeyesundera DN, Johnson SR. How Much Better Is Good Enough?: Patient-reported Outcomes, Minimal Clinically Important Differences, and Patient Acceptable Symptom States in Perioperative Research. *Anesthesiology* 2016;125(1):7-10. doi: 10.1097/ALN.0000000000001159
9. Brummett CM, Waljee JF, Goesling J, et al. New Persistent Opioid Use After Minor and Major Surgical Procedures in US Adults. *JAMA Surg* 2017;152(6):e170504. doi: 10.1001/jamasurg.2017.0504 [published Online First: 2017/04/14]
10. Kehlet H, Jensen TS, Woolf CJ. Persistent postsurgical pain: risk factors and prevention. *Lancet* 2006;367(9522):1618-25. doi: 10.1016/s0140-6736(06)68700-x [published Online First: 2006/05/16]
11. Brescia AA, Waljee JF, Hu HM, et al. Impact of Prescribing on New Persistent Opioid Use After Cardiothoracic Surgery. *Ann Thorac Surg* 2019;108(4):1107-13. doi: 10.1016/j.athoracsurg.2019.06.019 [published Online First: 2019/08/27]

12. Brat GA, Agniel D, Beam A, et al. Postsurgical prescriptions for opioid naive patients and association with overdose and misuse: retrospective cohort study. *Bmj* 2018;360:j5790. doi: 10.1136/bmj.j5790 [published Online First: 2018/01/19]
13. Wu CL, King AB, Geiger TM, et al. American Society for Enhanced Recovery and Perioperative Quality Initiative Joint Consensus Statement on Perioperative Opioid Minimization in Opioid-Naïve Patients. *Anesth Analg* 2019;129(2):567-77. doi: 10.1213/ane.0000000000004194 [published Online First: 2019/05/15]
14. Waljee JF, Zhong L, Hou H, et al. The Use of Opioid Analgesics following Common Upper Extremity Surgical Procedures: A National, Population-Based Study. *Plast Reconstr Surg* 2016;137(2):355e-64e. doi: 10.1097/01.prs.0000475788.52446.7b [published Online First: 2016/01/29]
15. Raebel MA, Newcomer SR, Bayliss EA, et al. Chronic opioid use emerging after bariatric surgery. *Pharmacoepidemiol Drug Saf* 2014;23(12):1247-57. doi: 10.1002/pds.3625 [published Online First: 2014/04/16]
16. Raebel MA, Newcomer SR, Reifler LM, et al. Chronic use of opioid medications before and after bariatric surgery. *Jama* 2013;310(13):1369-76. doi: 10.1001/jama.2013.278344 [published Online First: 2013/10/03]
17. Goesling J, Moser SE, Zaidi B, et al. Trends and predictors of opioid use after total knee and total hip arthroplasty. *Pain* 2016;157(6):1259-65. doi: 10.1097/j.pain.0000000000000516 [published Online First: 2016/02/13]
18. Inacio MC, Hansen C, Pratt NL, et al. Risk factors for persistent and new chronic opioid use in patients undergoing total hip arthroplasty: a retrospective cohort study. *BMJ Open* 2016;6(4):e010664. doi: 10.1136/bmjopen-2015-010664 [published Online First: 2016/05/01]
19. Oderda GM, Evans RS, Lloyd J, et al. Cost of Opioid-Related Adverse Drug Events in Surgical Patients. *Journal of Pain and Symptom Management* 2003;25(3):276-83. doi: 10.1016/S0885-3924(02)00691-7
20. Wheeler M, Oderda GM, Ashburn MA, et al. Adverse events associated with postoperative opioid analgesia: a systematic review. *J Pain* 2002;3(3):159-80. doi: 10.1054/jpai.2002.123652 [published Online First: 2003/11/19]
21. Blendon RJ, Benson JM. The Public and the Opioid-Abuse Epidemic. *New England Journal of Medicine* 2018;378(5):407-11. doi: 10.1056/NEJMp1714529
22. Fiona Campbell MH, Manon Choinière, Hani El-Gabalawy, Jacques Laliberté, Michael Sangster, Jaris Swidrovich, Linda Wilhelm. Canadian Pain Task Force Report: March 2021 2021 [Available from: <https://www.canada.ca/en/health-canada/corporate/about-health-canada/public-engagement/external-advisory-bodies/canadian-pain-task-force/report-2021.html>].
23. Canada CW. Opioid Wisely 2021 [Available from: <https://choosingwiselycanada.org/campaign/opioid-wisely/>].
24. McKeen DM, Banfield JC, McIsaac DI, et al. Top ten priorities for anesthesia and perioperative research: a report from the Canadian Anesthesia Research Priority Setting

- Partnership. *Canadian Journal of Anesthesia/Journal canadien d'anesthésie* 2020;67(6):641-54. doi: 10.1007/s12630-020-01607-6
25. Brown EN, Pavone KJ, Naranjo M. Multimodal General Anesthesia: Theory and Practice. *Anesth Analg* 2018;127(5):1246-58. doi: 10.1213/ane.0000000000003668 [published Online First: 2018/09/27]
26. Martinez V, Carles M, Marret E, et al. Perioperative use of gabapentinoids in France. Mismatch between clinical practice and scientific evidence. *Anaesth Crit Care Pain Med* 2018;37(1):43-47. doi: 10.1016/j.accpm.2017.01.010 [published Online First: 2017/04/02]
27. Verret M, Lauzier F, Zarychanski R, et al. Perioperative Use of Gabapentinoids for the Management of Postoperative Acute Pain: A Systematic Review and Meta-analysis. *Anesthesiology* 2020;133(2):265-79. doi: 10.1097/aln.0000000000003428 [published Online First: 2020/07/16]
28. Ollila A, Vikatmaa L, Sund R, et al. Efficacy and safety of intravenous esmolol for cardiac protection in non-cardiac surgery. A systematic review and meta-analysis. *Ann Med* 2019;51(1):17-27. doi: 10.1080/07853890.2018.1538565 [published Online First: 2018/10/23]
29. Blessberger H, Lewis SR, Pritchard MW, et al. Perioperative beta-blockers for preventing surgery-related mortality and morbidity in adults undergoing non-cardiac surgery. *Cochrane Database Syst Rev* 2019;9(9):Cd013438. doi: 10.1002/14651858.Cd013438 [published Online First: 2019/09/27]
30. Blaudszun G, Lysakowski C, Elia N, et al. Effect of perioperative systemic  $\alpha_2$  agonists on postoperative morphine consumption and pain intensity: systematic review and meta-analysis of randomized controlled trials. *Anesthesiology* 2012;116(6):1312-22. doi: 10.1097/ALN.0b013e31825681cb [published Online First: 2012/05/02]
31. Jessen Lundorf L, Korvenius Nedergaard H, Møller AM. Perioperative dexmedetomidine for acute pain after abdominal surgery in adults. *Cochrane Database Syst Rev* 2016;2:Cd010358. doi: 10.1002/14651858.CD010358.pub2 [published Online First: 2016/02/19]
32. Sanchez Munoz MC, De Kock M, Forget P. What is the place of clonidine in anesthesia? Systematic review and meta-analyses of randomized controlled trials. *J Clin Anesth* 2017;38:140-53. doi: 10.1016/j.jclinane.2017.02.003 [published Online First: 2017/04/05]
33. Brinck EC, Tiippana E, Heesen M, et al. Perioperative intravenous ketamine for acute postoperative pain in adults. *Cochrane Database Syst Rev* 2018;12(12):Cd012033. doi: 10.1002/14651858.CD012033.pub4 [published Online First: 2018/12/21]
34. Saito J, Ma D. Can dexmedetomidine protect against surgical stress response? *Clin Transl Med* 2020;10(2) doi: 10.1002/ctm2.96 [published Online First: 2020/07/01]
35. Zhu A, Benzon HA, Anderson TA. Evidence for the Efficacy of Systemic Opioid-Sparing Analgesics in Pediatric Surgical Populations: A Systematic Review. *Anesth Analg* 2017;125(5):1569-87. doi: 10.1213/ane.0000000000002434 [published Online First: 2017/10/20]

- 1  
2  
3 36. Husser T, Marcom J, Mark J, et al. Effectiveness of non-opioid pharmacological adjuncts for  
4 adult surgical patients: an umbrella review protocol. *JBIS Database System Rev Implement*  
5 *Rep* 2019;17(7):1319-25. doi: 10.11124/jbisrir-2017-003960 [published Online First:  
6 2019/03/20]  
7
- 8 37. Martinez V, Beloeil H, Marret E, et al. Non-opioid analgesics in adults after major surgery:  
9 systematic review with network meta-analysis of randomized trials. *BJA: British Journal*  
10 *of Anaesthesia* 2016;118(1):22-31. doi: 10.1093/bja/aew391  
11
- 12 38. Fiore JF, Jr., Olleik G, El-Kefraoui C, et al. Preventing opioid prescription after major  
13 surgery: a scoping review of opioid-free analgesia. *Br J Anaesth* 2019;123(5):627-36.  
14 doi: 10.1016/j.bja.2019.08.014 [published Online First: 2019/09/30]  
15
- 16 39. Meijer FS, Niesters M, van Velzen M, et al. Does nociception monitor-guided anesthesia  
17 affect opioid consumption? A systematic review of randomized controlled trials. *J Clin*  
18 *Monit Comput* 2020;34(4):629-41. doi: 10.1007/s10877-019-00362-4 [published Online  
19 First: 2019/07/22]  
20
- 21 40. Banerjee S, MacDougall D. CADTH Rapid Response Reports. Nociception Monitoring for  
22 General Anesthesia: A Review of Clinical Effectiveness, Cost-Effectiveness, and  
23 Guidelines. Ottawa (ON): Canadian Agency for Drugs and Technologies in Health  
24  
25 Copyright © 2018 Canadian Agency for Drugs and Technologies in Health. 2018.  
26
- 27 41. Ladha KS, Paterno E, Huybrechts KF, et al. Variations in the Use of Perioperative  
28 Multimodal Analgesic Therapy. *Anesthesiology* 2016;124(4):837-45. doi:  
29 10.1097/aln.0000000000001034 [published Online First: 2016/02/03]  
30
- 31 42. Stanley TH. Opiate anaesthesia. *Anaesth Intensive Care* 1987;15(1):38-59. doi:  
32 10.1177/0310057x8701500107 [published Online First: 1987/02/01]  
33
- 34 43. Kiliçkan L, Toker K. The effect of preemptive intravenous morphine on postoperative  
35 analgesia and surgical stress response. *Panminerva Med* 2001;43(3):171-5. [published  
36 Online First: 2001/10/02]  
37
- 38 44. Merkow RP, Ju MH, Chung JW, et al. Underlying reasons associated with hospital  
39 readmission following surgery in the United States. *Jama* 2015;313(5):483-95. doi:  
40 10.1001/jama.2014.18614 [published Online First: 2015/02/04]  
41
- 42 45. Kessler ER, Shah M, Gruschkus SK, et al. Cost and quality implications of opioid-based  
43 postsurgical pain control using administrative claims data from a large health system:  
44 opioid-related adverse events and their impact on clinical and economic outcomes.  
45 *Pharmacotherapy* 2013;33(4):383-91. doi: 10.1002/phar.1223 [published Online First:  
46 2013/04/05]  
47
- 48 46. Xuan C, Yan W, Wang D, et al. Efficacy of preemptive analgesia treatments for the  
49 management of postoperative pain: a network meta-analysis. *British Journal of*  
50 *Anaesthesia* 2022;129(6):946-58. doi: 10.1016/j.bja.2022.08.038  
51
- 52 47. Moonesinghe SR, Jackson AIR, Boney O, et al. Systematic review and consensus definitions  
53 for the Standardised Endpoints in Perioperative Medicine initiative: patient-centred  
54 outcomes. *Br J Anaesth* 2019;123(5):664-70. doi: 10.1016/j.bja.2019.07.020 [published  
55 Online First: 2019/09/09]  
56  
57  
58  
59  
60

- 1  
2  
3  
4  
5  
6  
7  
8  
9  
10  
11  
12  
13  
14  
15  
16  
17  
18  
19  
20  
21  
22  
23  
24  
25  
26  
27  
28  
29  
30  
31  
32  
33  
34  
35  
36  
37  
38  
39  
40  
41  
42  
43  
44  
45  
46  
47  
48  
49  
50  
51  
52  
53  
54  
55  
56  
57  
58  
59  
60
48. Aromataris E MZ. JBI Manual for Evidence Synthesis 2020 [Available from: <https://synthesismanual.jbi.global>. <https://doi.org/10.46658/JBIMES-20-01>].
  49. Pawliuk C, Brown HL, Widger K, et al. Optimising the process for conducting scoping reviews. *BMJ Evidence-Based Medicine* 2020;bmjebm-2020-111452. doi: 10.1136/bmjebm-2020-111452
  50. Levac D, Colquhoun H, O'Brien KK. Scoping studies: advancing the methodology. *Implementation Science* 2010;5(1):69. doi: 10.1186/1748-5908-5-69
  51. Arksey H, O'Malley L. Scoping studies: towards a methodological framework. *International Journal of Social Research Methodology* 2005;8(1):19-32. doi: 10.1080/1364557032000119616
  52. Munn Z, Peters MDJ, Stern C, et al. Systematic review or scoping review? Guidance for authors when choosing between a systematic or scoping review approach. *BMC Medical Research Methodology* 2018;18(1):143. doi: 10.1186/s12874-018-0611-x
  53. Program KT. What Review is Right for You? 2022 [Available from: <https://whatreviewisrightforyou.knowledgetranslation.net/map/form>].
  54. Peters MDJ, Godfrey C, McInerney P, et al. Best practice guidance and reporting items for the development of scoping review protocols. *JBI Evid Synth* 2022 doi: 10.11124/jbies-21-00242 [published Online First: 2022/02/02]
  55. Pollock D, Alexander L, Munn Z, et al. Moving from consultation to co-creation with knowledge users in scoping reviews: guidance from the JBI Scoping Review Methodology Group. *JBI Evidence Synthesis* 2022;20(4):969-79. doi: 10.11124/jbies-21-00416
  56. Tricco AC, Lillie E, Zarin W, et al. PRISMA Extension for Scoping Reviews (PRISMA-ScR): Checklist and Explanation. *Annals of Internal Medicine* 2018;169(7):467-73. doi: 10.7326/M18-0850
  57. Staniszewska S, Brett J, Simera I, et al. GRIPP2 reporting checklists: tools to improve reporting of patient and public involvement in research. *BMJ* 2017;358:j3453. doi: 10.1136/bmj.j3453
  58. McGowan J, Sampson M, Salzwedel DM, et al. PRESS Peer Review of Electronic Search Strategies: 2015 Guideline Statement. *J Clin Epidemiol* 2016;75:40-6. doi: 10.1016/j.jclinepi.2016.01.021 [published Online First: 2016/03/24]
  59. Jackson JL, Kuriyama A, Anton A, et al. The Accuracy of Google Translate for Abstracting Data From Non-English-Language Trials for Systematic Reviews. *Ann Intern Med* 2019;171(9):677-79. doi: 10.7326/m19-0891 [published Online First: 2019/07/30]
  60. Takakusagi Y, Oike T, Shirai K, et al. Validation of the Reliability of Machine Translation for a Medical Article From Japanese to English Using DeepL Translator. *Cureus* 2021;13(9):e17778. doi: 10.7759/cureus.78. eCollection 2021 Sep.
  61. Canada Go. Roadmap for Open Science 2020 [Available from: [https://www.ic.gc.ca/eic/site/063.nsf/eng/h\\_97992.html](https://www.ic.gc.ca/eic/site/063.nsf/eng/h_97992.html)].

- 1  
2  
3  
4  
5  
6  
7  
8  
9  
10  
11  
12  
13  
14  
15  
16  
17  
18  
19  
20  
21  
22  
23  
24  
25  
26  
27  
28  
29  
30  
31  
32  
33  
34  
35  
36  
37  
38  
39  
40  
41  
42  
43  
44  
45  
46  
47  
48  
49  
50  
51  
52  
53  
54  
55  
56  
57  
58  
59  
60
62. Kohl C, McIntosh EJ, Unger S, et al. Online tools supporting the conduct and reporting of systematic reviews and systematic maps: a case study on CADIMA and review of existing tools. *Environmental Evidence* 2018;7(1):8. doi: 10.1186/s13750-018-0115-5
63. Boet S, Burns JK, Cheng-Boivin O, et al. Mapping multicenter randomized controlled trials in anesthesiology: a scoping review. *Systematic Reviews* 2021;10(1):276. doi: 10.1186/s13643-021-01776-5
64. Hamel C, Hersi M, Kelly SE, et al. Guidance for using artificial intelligence for title and abstract screening while conducting knowledge syntheses. *BMC Medical Research Methodology* 2021;21(1):285. doi: 10.1186/s12874-021-01451-2
65. Hamel C, Kelly SE, Thavorn K, et al. An evaluation of DistillerSR's machine learning-based prioritization tool for title/abstract screening – impact on reviewer-relevant outcomes. *BMC Medical Research Methodology* 2020;20(1):256. doi: 10.1186/s12874-020-01129-1
66. Nama N, Sampson M, Barrowman N, et al. 41 Validation of crowdsourcing for citation screening in systematic reviews. *BMJ Evidence-Based Medicine* 2019;24(Suppl 1):A26-A26. doi: 10.1136/bmjebm-2019-EBMLive.49
67. DistillerSR. 2022 [Version 2.35:[Available from: <https://www.evidencepartners.com>.
68. Creighton DW, Kumar AH, Grant SA. Perioperative Multimodal Pain Management: an Evidence-Based Update. *Current Anesthesiology Reports* 2019;9(3):295-307. doi: 10.1007/s40140-019-00340-1
69. Kumar K, Kirksey MA, Duong S, et al. A Review of Opioid-Sparing Modalities in Perioperative Pain Management: Methods to Decrease Opioid Use Postoperatively. *Anesth Analg* 2017;125(5):1749-60. doi: 10.1213/ANE.0000000000002497 [published Online First: 2017/10/20]
70. Rivera SC, Kyte DG, Aiyegbusi OL, et al. The impact of patient-reported outcome (PRO) data from clinical trials: a systematic review and critical analysis. *Health and Quality of Life Outcomes* 2019;17(1):156. doi: 10.1186/s12955-019-1220-z
71. Moonesinghe SR, Jackson AIR, Boney O, et al. Systematic review and consensus definitions for the Standardised Endpoints in Perioperative Medicine initiative: patient-centred outcomes. *Br J Anaesth* 2019;123(5):664-70. doi: 10.1016/j.bja.2019.07.020 [published Online First: 2019/09/09]
72. Kent ML, Hurley RW, Oderda GM, et al. American Society for Enhanced Recovery and Perioperative Quality Initiative-4 Joint Consensus Statement on Persistent Postoperative Opioid Use: Definition, Incidence, Risk Factors, and Health Care System Initiatives. *Anesth Analg* 2019;129(2):543-52. doi: 10.1213/ane.0000000000003941 [published Online First: 2019/03/22]
73. Jivraj NK, Raghavji F, Bethell J, et al. Persistent Postoperative Opioid Use: A Systematic Literature Search of Definitions and Population-based Cohort Study. *Anesthesiology* 2020;132(6):1528-39. doi: 10.1097/ALN.0000000000003265
74. Fazal N, Jackson SF, Wong K, et al. Between worst and best: developing criteria to identify promising practices in health promotion and disease prevention for the Canadian Best

- Practices Portal. *Health promotion and chronic disease prevention in Canada : research, policy and practice* 2017;37(11):386-92. doi: 10.24095/hpcdp.37.11.03
75. Prevention CfDCa. Gaining Consensus Among Stakeholders Through the Nominal Group Technique 2018 [Available from: <https://www.cdc.gov/healthyyouth/evaluation/pdf/brief7.pdf>].
76. Snyder C, Gilbert A, Moher D, et al. Recommendations for including or reviewing patient reported outcome endpoints in grant applications. *Bmj* 2021;373:n1367. doi: 10.1136/bmj.n1367 [published Online First: 2021/07/02]
77. Calvert M, King M, Mercieca-Bebber R, et al. SPIRIT-PRO Extension explanation and elaboration: guidelines for inclusion of patient-reported outcomes in protocols of clinical trials. *BMJ Open* 2021;11(6):e045105. doi: 10.1136/bmjopen-2020-045105
78. Stark PA, Myles PS, Burke JA. Development and Psychometric Evaluation of a Postoperative Quality of Recovery Score: The QoR-15. *Anesthesiology* 2013;118(6):1332-40. doi: 10.1097/ALN.0b013e318289b84b
79. Herdman M, Gudex C, Lloyd A, et al. Development and preliminary testing of the new five-level version of EQ-5D (EQ-5D-5L). *Qual Life Res* 2011;20(10):1727-36. doi: 10.1007/s11136-011-9903-x [published Online First: 2011/04/12]
80. Federici S, Bracalenti M, Meloni F, et al. World Health Organization disability assessment schedule 2.0: An international systematic review. *Disabil Rehabil* 2017;39(23):2347-80. doi: 10.1080/09638288.2016.1223177 [published Online First: 2016/11/09]
81. Bauer M, Böhler H, Aichele G, et al. Measuring patient satisfaction with anaesthesia: perioperative questionnaire versus standardised face-to-face interview. *Acta Anaesthesiol Scand* 2001;45(1):65-72. doi: 10.1034/j.1399-6576.2001.450111.x [published Online First: 2001/01/11]
82. Research Sfp-O. Strategy for Patient-Oriented Research: Patient Engagement Framework 2019 [Available from: [https://cibr-irsc.gc.ca/e/documents/spor\\_framework-en.pdf](https://cibr-irsc.gc.ca/e/documents/spor_framework-en.pdf)].
83. Hall TL, Barrientos-Ortiz C, Peña-Jackson G, et al. Facilitators and Barriers to Patient-Centered Outcomes Research Partnership Sustainability in the United States. *J Patient Cent Res Rev* 2021;8(1):8-19. doi: 10.17294/2330-0698.1770
84. society E. List of guidelines 2021 [Available from: <https://erassociety.org/guidelines/list-of-guidelines/>].
85. Mariano ER, Dickerson DM, Szokol JW, et al. A multisociety organizational consensus process to define guiding principles for acute perioperative pain management. *Regional Anesthesia & Pain Medicine* 2021:rapm-2021-103083. doi: 10.1136/rapm-2021-103083
86. Wilkinson P. Surgery and Opioids: Best Practice Guidelines 2021 2021 [Available from: [https://fpm.ac.uk/sites/fpm/files/documents/2021-03/surgery-and-opioids-2021\\_4.pdf](https://fpm.ac.uk/sites/fpm/files/documents/2021-03/surgery-and-opioids-2021_4.pdf)].
87. Laserna A, Rubinger DA, Barahona-Correa JE, et al. Levels of Evidence Supporting the North American and European Perioperative Care Guidelines for Anesthesiologists between 2010 and 2020: A Systematic Review. *Anesthesiology* 2021;135(1):31-56. doi: 10.1097/aln.0000000000003808



1  
2  
3  
4  
5  
6  
7  
8  
9  
10  
11  
12  
13  
14  
15  
16  
17  
18  
19  
20  
21  
22  
23  
24  
25  
26  
27  
28  
29  
30  
31  
32  
33  
34  
35  
36  
37  
38  
39  
40  
41  
42  
43  
44  
45  
46  
47  
48  
49  
50  
51  
52  
53  
54  
55  
56  
57  
58  
59  
60

For peer review only

**Authors contributions:**

Study question: MV, DF, ML, AFT, FZ, MG, ML, AG

Design and methodology: MV, DF, ML, AFT, FZ, MG, ML, AG, NHL

Develop search strategy: MV, DF, ML, AFT, NHL, RS

Drafting the manuscript: MV, DF, ML, NHL

Revise the manuscript: MV, DF, ML, AFT, FZ, MG, ML, AG, NHL, SC, MH, ALM, NF, SN, DM, IG, BH, MB, PP, GM, JM, HM, RS, HD

Guide artificial intelligence feature for screening titles and abstracts: BH

Design data extraction form: MV, DF, ML, AFT, BL, FZ, MG, ML, AG, NHL

Lead patient engagement activities: MV, SN

Lead knowledge user partnership activities: MV, DF, ML

Screening, data abstraction, and data charting: MV, NHL, SC, MH, ALM, NF

All authors reviewed the content of the protocol and approved the final version.

**Data statement:**

Technical appendix and meta-data will be publicly available on Open Science Foundation (OSF) in our project file following the publication of the manuscript reporting the results.

**Funding statement:**

This work was supported by CIHR Project Grant, priority announcement: Patient-Oriented Research [480819] as well as a grant from the University of Ottawa Department of Anesthesiology and Pain Medicine. Michael Verret is supported by the Vanier Canada Graduate Scholarship Program from the CIHR, the FRQS/MSSS Resident Physician Health Research Training Program (phase 2), the Canadian Blood Services Graduate Fellowship Program and the McLaughlin Dean's Award from Université Laval. Manoj Lalu is supported by University of Ottawa Junior Clinical Research Chair, Canadian Anesthesiologist's Career Scientist Award, and the The Ottawa Hospital Anesthesia Alternate Funds Association. Méanie Bérubé is the recipient of salary support awards from the Fonds de Recherche en Santé-Québec (FRQS) and the Strategy for Patient-Oriented Research-Quebec.

1  
2  
3 **Competing interest statement:** Dr Ian Gilron has received consulting fees from GW Research,  
4 Eupraxia, Biogen, and Novaremed.

5  
6 **Patient and public involvement:** Patients were involved in the design, conduct, and reporting  
7 plans of this research. Refer to the Methods and patient and public involvement sections for  
8 further details.  
9

10  
11 **Provenance and peer review:** This study was peer reviewed by the Canadian Institute Health  
12 and Research (CIHR) organization.  
13  
14  
15  
16  
17  
18  
19  
20  
21  
22  
23  
24  
25  
26  
27  
28  
29  
30  
31  
32  
33  
34  
35  
36  
37  
38  
39  
40  
41  
42  
43  
44  
45  
46  
47  
48  
49  
50  
51  
52  
53  
54  
55  
56  
57  
58  
59  
60

For peer review only

# BMJ Open

## Intraoperative pharmacologic opioid minimization strategies and patient-centred outcomes after surgery: a scoping review protocol

|                               |                                                                                                                                                                                                                                                                                                                                                                                                                                                                                                                                                                                                                                                                                                                                                                                                                                                                                                                                                                                                                                                                                                                                                                                                                                                                                                                                                                                                                                                                                                                                                                                                                                                                                                                                                                                                                                                                                                                                                                                                                                                                                                                              |
|-------------------------------|------------------------------------------------------------------------------------------------------------------------------------------------------------------------------------------------------------------------------------------------------------------------------------------------------------------------------------------------------------------------------------------------------------------------------------------------------------------------------------------------------------------------------------------------------------------------------------------------------------------------------------------------------------------------------------------------------------------------------------------------------------------------------------------------------------------------------------------------------------------------------------------------------------------------------------------------------------------------------------------------------------------------------------------------------------------------------------------------------------------------------------------------------------------------------------------------------------------------------------------------------------------------------------------------------------------------------------------------------------------------------------------------------------------------------------------------------------------------------------------------------------------------------------------------------------------------------------------------------------------------------------------------------------------------------------------------------------------------------------------------------------------------------------------------------------------------------------------------------------------------------------------------------------------------------------------------------------------------------------------------------------------------------------------------------------------------------------------------------------------------------|
| Journal:                      | <i>BMJ Open</i>                                                                                                                                                                                                                                                                                                                                                                                                                                                                                                                                                                                                                                                                                                                                                                                                                                                                                                                                                                                                                                                                                                                                                                                                                                                                                                                                                                                                                                                                                                                                                                                                                                                                                                                                                                                                                                                                                                                                                                                                                                                                                                              |
| Manuscript ID                 | bmjopen-2022-070748.R1                                                                                                                                                                                                                                                                                                                                                                                                                                                                                                                                                                                                                                                                                                                                                                                                                                                                                                                                                                                                                                                                                                                                                                                                                                                                                                                                                                                                                                                                                                                                                                                                                                                                                                                                                                                                                                                                                                                                                                                                                                                                                                       |
| Article Type:                 | Protocol                                                                                                                                                                                                                                                                                                                                                                                                                                                                                                                                                                                                                                                                                                                                                                                                                                                                                                                                                                                                                                                                                                                                                                                                                                                                                                                                                                                                                                                                                                                                                                                                                                                                                                                                                                                                                                                                                                                                                                                                                                                                                                                     |
| Date Submitted by the Author: | 01-Feb-2023                                                                                                                                                                                                                                                                                                                                                                                                                                                                                                                                                                                                                                                                                                                                                                                                                                                                                                                                                                                                                                                                                                                                                                                                                                                                                                                                                                                                                                                                                                                                                                                                                                                                                                                                                                                                                                                                                                                                                                                                                                                                                                                  |
| Complete List of Authors:     | <p>Verret, Michael; Université Laval, CHU de Québec; Ottawa Hospital Research Institute, Clinical Epidemiology</p> <p>Lam, Nhat Hung; University of Ottawa, Ottawa, Ontario, Canada, Faculty of Medicine</p> <p>Fergusson, Dean; Ottawa Hospital Research Institute, Clinical Epidemiology</p> <p>Nicholls, Stuart ; Ottawa Hospital Research Institute, Clinical Epidemiology</p> <p>Turgeon, Alexis; Centre de Recherche du Centre Hospitalier Affilié Universitaire de Québec (CHA), Axe Traumatologie-urgence-soins intensifs, CHA-Hôpital de l'Enfant-Jésus, Université Laval, Anesthesia and Critical Care Medicine</p> <p>McIsaac, Daniel; The Ottawa Hospital, Anesthesiology and Pain Medicine</p> <p>Gilron, Ian; Queen's University, Anesthesiology</p> <p>Hamtiaux, Myriam; University of Ottawa, Ottawa, Ontario, Canada, Faculty of Medicine</p> <p>Srichandramohan, Sriyathavan; University of Ottawa, Ottawa, Ontario, Canada, Faculty of Medicine</p> <p>Al-Mazidi, Abdulaziz; University of Ottawa, Ottawa, Ontario, Canada, Faculty of Medicine</p> <p>A. Fergusson, Nicholas; University of Calgary, Faculty of Medicine</p> <p>Hutton, Brian; University of Ottawa, Ottawa, Ontario, Canada, ; Ottawa Hospital Research Institute</p> <p>Zivkovic, Fiona; Ottawa Hospital, Patient partner</p> <p>Graham, Megan; Ottawa Hospital, Patient partner</p> <p>Geist, Allison; Ottawa Hospital, Patient partner</p> <p>Le, Maxime; Ottawa Hospital,</p> <p>Berube, Melanie; CHU de Quebec-Universite Laval, ; Universite Laval, Faculty of Nursing</p> <p>Poulin, Patricia; Ottawa Hospital Research Institute, Clinical Epidemiology</p> <p>Shorr , Risa; Ottawa Hospital, Learning Services</p> <p>Daudt, Helena; Pain Canada</p> <p>Martel, Guillaume; Ottawa Hospital Research Institute, Clinical Epidemiology</p> <p>McVicar, Jason; The Ottawa Hospital, Anesthesiology and Pain Medicine</p> <p>Moloo, Husein; The Ottawa Hospital, Surgery; The Ottawa Hospital Research Institute , Clinical Epidemiology Program</p> <p>Lalu, Manoj; Ottawa Hospital Research Institute, Clinical Epidemiology</p> |

1  
2  
3  
4  
5  
6  
7  
8  
9  
10  
11  
12  
13  
14  
15  
16  
17  
18  
19  
20  
21  
22  
23  
24  
25  
26  
27  
28  
29  
30  
31  
32  
33  
34  
35  
36  
37  
38  
39  
40  
41  
42  
43  
44  
45  
46  
47  
48  
49  
50  
51  
52  
53  
54  
55  
56  
57  
58  
59  
60

|                                  |                                                                                                                                           |
|----------------------------------|-------------------------------------------------------------------------------------------------------------------------------------------|
|                                  | Perioperative Anesthesia Clinical Trials Group , Perioperative Anesthesia Clinical Trials; Perioperative Anesthesia Clinical Trials group |
| <b>Primary Subject Heading</b> : | Anaesthesia                                                                                                                               |
| Secondary Subject Heading:       | Anaesthesia, Addiction, Patient-centred medicine                                                                                          |
| Keywords:                        | Pain management < ANAESTHETICS, Adult anaesthesia < ANAESTHETICS, SURGERY, CLINICAL PHARMACOLOGY                                          |
|                                  |                                                                                                                                           |

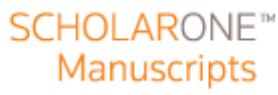

## Intraoperative pharmacologic opioid minimization strategies and patient-centred outcomes after surgery: a scoping review protocol

Michael Verret<sup>1,2,5</sup>, Nhat Hung Lam<sup>1,3</sup>, Dean A. Fergusson<sup>1,2,3</sup>, Stuart G. Nicholls<sup>1,6</sup>, Alexis F. Turgeon<sup>4,5</sup>, Daniel I McIsaac<sup>1,2,3</sup>, Ian Gilron<sup>10</sup>, Myriam Hamtiaux<sup>1,3</sup>, Sriyathavan Srichandramohan<sup>1,3</sup>, Abdulaziz Al-Mazidi<sup>1,3</sup>, Nicholas A. Fergusson<sup>11</sup>, Brian Hutton<sup>1</sup>, Fiona Zivkovic<sup>9</sup>, Megan Graham<sup>9</sup>, Maxime Le<sup>9</sup>, Allison Geist<sup>9</sup>, Mélanie Bérubé<sup>4,7,8</sup>, Patricia Poulin<sup>1</sup>, Risa Shorr<sup>12</sup>, Helena Daudt<sup>13</sup>, Guillaume Martel<sup>1</sup>, Jason McVicar<sup>1,2</sup>, Husein Moloo<sup>1</sup>, Manoj Lalu<sup>1,2,3</sup> on behalf of the Perioperative Anesthesia Clinical Trials (PACT) group

<sup>1</sup>Clinical Epidemiology Program, Ottawa Hospital Research Institute, Departments of Medicine, Surgery, & School of Epidemiology and Public Health, University of Ottawa OHRI/uOttawa Clinical Epidemiology Program Endowed Chair, Ontario, Canada

<sup>2</sup>Department of Anesthesiology and Pain Medicine, uOttawa, Civic Campus, The Ottawa Hospital, Ontario, Canada

<sup>3</sup>Faculty of Medicine, University of Ottawa, Ontario, Canada

<sup>4</sup>Population Health and Optimal Health Practices Research Unit (Trauma - Emergency - Critical Care Medicine), CHU de Québec - Université Laval Research Center, Québec, Canada

<sup>5</sup>Departments of Anesthesiology and Critical Care Medicine, Faculty of Medicine, Université Laval, Québec, Canada

<sup>6</sup>Ottawa Methods Centre, Ottawa Hospital Research Institute

<sup>7</sup>Faculty of Nursing, 1050 Avenue de la Médecine, Université Laval, Québec City, Quebec, Canada, G1V 0A6

<sup>8</sup>Quebec Pain Research Network, 3001 12e Avenue Nord, Sherbrooke, Quebec, Canada, J1H 5N4

<sup>9</sup>Patient partner, The Ottawa Hospital, Ontario, Canada

<sup>10</sup>Department of Anesthesiology, Queen's University, Kingston, Ontario, Canada

<sup>11</sup>Department of Anesthesiology, Perioperative & Pain Medicine, University of Calgary, Calgary, Alberta, Canada

<sup>12</sup>Library Services, The Ottawa Hospital, Ontario, Canada

<sup>13</sup>Pain Canada, Pain BC, British Columbia, Canada

### Corresponding author

Michael Verret

Clinical Epidemiology Program, Ottawa Hospital Research Institute, 501 Smyth Road, PO Box 201B, Ottawa, Ontario K1H 8L6, Canada.

Phone: 613-737-8899 (x79842)

1  
2  
3  
4  
5  
6  
7  
8  
9  
10  
11  
12  
13  
14  
15  
16  
17  
18  
19  
20  
21  
22  
23  
24  
25  
26  
27  
28  
29  
30  
31  
32  
33  
34  
35  
36  
37  
38  
39  
40  
41  
42  
43  
44  
45  
46  
47  
48  
49  
50  
51  
52  
53  
54  
55  
56  
57  
58  
59  
60

[mverr051@uottawa.ca](mailto:mverr051@uottawa.ca)  
[Michael.verret.med@ssss.gouv.qc.ca](mailto:Michael.verret.med@ssss.gouv.qc.ca)  
[michael.verret.2@ulaval.ca](mailto:michael.verret.2@ulaval.ca)

word count: 2930

**Keywords**

Pain management, Adult anaesthesia, Surgery, Clinical pharmacology

For peer review only

## ABSTRACT

**Introduction:** For close to a century, opioid administration has been a standard of care to complement anesthesia during surgery. Considering the worldwide opioid epidemic, this practice is now being challenged and there is a growing use of systemic pharmacological opioid minimizing strategies. Our aim is to conduct a scoping review that will examine clinical trials that have evaluated the impact of intraoperative opioid minimization strategies on patient-centred outcomes and identify promising strategies.

**Methods and Analysis:** Our scoping review will follow the framework developed by Arksey and O'Malley. We will search MEDLINE, Embase, CENTRAL, Web of Science, and CINAHL, from their inception approximately in March 2023. We will include randomized controlled trials, assessing the impact of systemic intraoperative pharmacologic opioid minimization strategies on patient-centred outcomes. We define an opioid minimization strategy as any non-opioid drug with antinociceptive properties administered during the intraoperative period. Patient-centred outcomes will be defined and classified based on the consensus definitions established by the Standardised Endpoints in Perioperative Medicine initiative (StEP-COMPAC group) and informed by knowledge users and patient partners. We will use a co-production approach involving interested parties. Our multidisciplinary team includes knowledge users, patient partners, methodologists and knowledge user organizations. Knowledge users will provide input on methods, outcomes, clinical significance of findings, implementation, and feasibility. Patient partners will participate in assessing the relevance of our design, methods, and outcomes and help to facilitate evidence translation. We will provide a thorough description of available clinical trials, compare their reported patient-centred outcome measures with established recommendations and identify promising strategies.

**Ethics and dissemination:** Ethics approval is not required for the review. Our scoping review will inform future research including clinical trials and systematic reviews through identification of important intraoperative interventions. Results will be disseminated through a peer-reviewed publication, presentation at conferences, and through our network of knowledge user collaborators.

**Registration:** Open Science Foundation (currently embargoed, [https://osf.io/7kea3/?view\\_only=49946e5dc46c41a59911d247191c9049](https://osf.io/7kea3/?view_only=49946e5dc46c41a59911d247191c9049))



## Article Summary

### Strengths and limitations of this study

- This review will identify existing and promising pharmacologic intraoperative strategies that can be used as alternatives to opioids.
- It will assess patient-centred outcomes that are meaningful for patients and decision makers in perioperative medicine.
- Identification of relevant citations will be searched through five databases, namely MEDLINE, Embase, CENTRAL, Web of Science, and CINAHL.
- We are using an integrated knowledge translation approach; including patients, knowledge user organizations and clinicians as partners in all the phases of this review.
- The scope of this review will not include non pharmacologic opioid minimization strategies.

## INTRODUCTION

Opioid administration is recognized as a standard of care to complement general anesthesia in order to reduce pain and maintain overall physiological stability (heart rate, blood pressure, metabolic) during surgery.[1] However potential disadvantages of opioids (ie. risk of tolerance, nausea, confusion, dependence, etc.),[2-20] as well as the worldwide opioid crisis, have led to a re-evaluation of their routine intraoperative use.[21] Multiple national and international societies [22, 23] have advised that opioid minimization strategies (eg. pharmacologic opioid alternatives) be developed and carefully assessed using a patient-oriented approach. In addition, intraoperative opioid minimization strategies and practices have been identified as patient and caregiver priorities by the recent James Lind Alliance-led Canadian Anesthesia Research Priority Setting Partnership exercise.[24]

Over the last two decades, more than twenty non-opioid alternative strategies have been developed to complement general anesthesia, with most being used “off-label” (ie. use of drug for an indication that has not been approved by regulatory agencies for this specific purpose).[25] Of note, pharmacologic opioid minimization strategies during the intraoperative period are being adopted despite limited evidence to inform best practice and with large variation in practices.[25-27] While the results of previous reviews and randomized controlled trials (RCTs) suggest that opioid alternatives can reduce short-term opioid use during and after surgery, they have focused primarily on the effect of pharmacologic opioid minimizing strategies on surrogate outcome measures, such as short-term quantity of opioids administered, hemodynamic stability, or unidimensional instruments (eg. pain intensity assessment).[6-18, 28-46] There is a paucity of evidence regarding the impact of opioid minimization strategies on long-term opioid use and outcomes that are the most meaningful to patients. Importantly, patients were not engaged or consulted on their preferences in previous reviews. Thus, while some pharmacologic strategies have been identified as potentially beneficial, a global perspective that maps all potential pharmacologic opioid alternatives during the intraoperative period, including their potential impact on clinically relevant outcomes most meaningful to patients, is noticeably lacking.[28-34] Further, there is a need to integrate guidance provided by the Standardised Endpoints in Perioperative Medicine initiative (StEP-COMPAC), a group that

1  
2  
3 established recommendations for patient-centred outcome measures to be assessed in  
4 perioperative trials to better inform future research and priorities.[47]  
5  
6  
7

8 To address this knowledge gap, we have assembled a multidisciplinary team of knowledge users,  
9 a patient panel, clinicians, policy makers, trainees and methodologists, to conduct a patient-  
10 oriented scoping review to examine the current evidence of RCTs assessing intraoperative  
11 pharmacologic opioid minimization strategies. Our primary aim is to map and characterize the  
12 RCT evidence assessing the patient-centred effectiveness of pharmacologic intraoperative opioid  
13 minimization strategies in adult surgical patients. This will include a description of the  
14 pharmacologic strategies assessed and identification of promising pharmacologic strategies. Our  
15 secondary aim is to synthesize the reported patient-centred outcomes in RCTs evaluating  
16 pharmacologic intraoperative opioid minimization strategies by mapping and characterizing the  
17 trial reported outcomes.  
18  
19  
20  
21  
22  
23  
24  
25  
26

## 27 **METHODS AND ANALYSIS**

### 28 **Review question**

29  
30 Our main research question aims to identify and describe pharmacologic opioid minimization  
31 strategies for use during the intraoperative period that are tailored to the needs of surgical  
32 patients undergoing general anesthesia. We have defined our eligibility criteria according to the  
33 Participant, Concept and Context, and Source (PCCS) framework.[48] The eligibility criteria  
34 have been informed through discussions with interested parties including patient partners.  
35 Important definitions are detailed in Appendix 1.  
36  
37  
38  
39  
40  
41  
42

### 43 **Design**

44 Our scoping review will follow best practices including the methodological framework  
45 developed by Arksey and O'Malley[49] [50] [51] and recommendations from the Joanna Briggs  
46 Institute (JBI).[48] We have chosen a scoping review design over other approaches to knowledge  
47 synthesis considering the large number of strategies available, the complexity of the field, as well  
48 as established recommendations for choosing the most appropriate knowledge synthesis research  
49 design.[52] [53] Our protocol is reported in accordance with JBI guidance,[54, 55] and our final  
50 review will be reported following the Preferred Reporting Items for Systematic Reviews and  
51  
52  
53  
54  
55  
56  
57  
58  
59  
60

1  
2  
3 Meta-Analyses (PRISMA) Extension for Scoping Review guidelines.[56] We will be using the  
4 Guidance for Reporting Involvement of Patients and Public (GRIPP2) checklist to report patient  
5 involvement in our review.[57] Our study is registered with the Open Science Foundation and all  
6 modifications will be posted. We started this study in February 2022 by assembling our team of  
7 investigators and partners and applying for Canadian Institutes of Health Research funding. The  
8 study will end with dissemination of results planned by December 2023.  
9  
10  
11  
12  
13

## 14 15 **Eligibility criteria**

### 16 17 **Participants**

18 Our target population will be adult ( $\geq 18$  years old) surgical patients considering significant  
19 differences for patient-centred outcome measures between adult and children. We will include  
20 studies involving any type of surgery (elective vs. emergent, cardiac vs. non-cardiac) and any  
21 surgical patient population (opioid naïve, opioid user, parturient, etc.) undergoing general  
22 anesthesia. The total sample size will need to be at least 30 participants considering statistical  
23 and clinical limitations of small sample size studies for pragmatism research question.  
24  
25  
26  
27  
28  
29  
30

### 31 32 **Concept**

33 We will include RCTs and cluster RCTs assessing the impact of a systemic intraoperative  
34 pharmacologic opioid minimization strategy compared with one or more control groups  
35 consisting of systemic opioids, routine care, or systemic placebo on patient-centred outcomes  
36 (see Appendix 1 for definitions). A systemic opioid minimization strategy is defined as any non-  
37 opioid drug with anti-nociceptive properties administered orally, or using intramuscular,  
38 subcutaneous or intravenous injection during the intraoperative period (see appendix 2 for the list  
39 of classes of drugs included).[13] The intervention must be started during the intraoperative  
40 period, and there is no limitation for the duration of the intervention.  
41  
42  
43  
44  
45  
46  
47

### 48 49 **Context**

50 At least one patient-centred outcome must be assessed and reported in the study based on StEP-  
51 COMPAC recommendations (well-being, functional outcomes, patient satisfaction, quality of  
52 life, and life impact).[47] Any instruments that could be categorized in one of these domains will  
53 be included. Based on discussions with patient partners, we will also include within the scope of  
54  
55  
56  
57  
58  
59  
60

1  
2  
3 patient-centred outcomes long-term opioid use ( $\geq 1$  month), opioid-related adverse effects  
4 (multidimensional assessment), acute pain (multidimensional assessment,  $< 3$  months), and  
5 postoperative chronic pain ( $\geq 3$  months).[24] Studies assessing patient-centred outcome  
6 measures only during the time in recovery room will not be included as this time point was  
7 judged to be less meaningful by both the patient partners and knowledge users.  
8  
9  
10  
11  
12

### 13 **Information sources**

14 We will only include RCTs as it is the gold standard study design to address the potential effect  
15 of an intervention. We anticipate to retrieve a large number of RCTs meeting our eligibility  
16 criteria. Only articles published in peer-reviewed journals will be included.  
17  
18  
19  
20  
21

### 22 **Search strategy**

23 Our search strategy was developed using a three-step approach in collaboration with method  
24 experts, patients, anesthesiologists, surgeons, pain experts and an information specialist.[48] Key  
25 terms to be included were informed by discussion with our stakeholder group (Appendix 3).  
26 First, we ran the pilot search strategy (Appendix 4) in two databases (MEDLINE and CINAHL).  
27 This search strategy was developed following the Peer Review of Electronic Search Strategies  
28 (PRESS) recommendations and it was peer-reviewed independently by one information  
29 specialist.[58] Text terms contained in the title and abstract of relevant citations as well as index  
30 terms were collected based on our pilot search strategy. Second, we added those text terms and  
31 index terms to the search strategy, which we then ran through MEDLINE, Embase, CENTRAL,  
32 Web of Science, and CINAHL from inception. To ensure the sensitivity of the search strategy,  
33 we verified that the strategy returned a set of 25 pre-identified RCT publications meeting our  
34 eligibility criteria. We did not limit language of publication and we plan to translate relevant  
35 studies using DeepL (<https://www.deepl.com/translator>).[59, 60]  
36  
37  
38  
39  
40  
41  
42  
43  
44  
45  
46  
47

### 48 **Study records**

#### 49 *Data management*

50 Applicability, reproducibility and impact will be increased by following the Canadian Roadmap  
51 for Open Science (registering the review, publishing the protocol, accessible and reproducible  
52  
53  
54  
55  
56  
57

1  
2  
3 data and results, etc.).[61] Any deviations from our protocol will be noted, with rationale, in the  
4 completed review and on our Open Science Framework project file.  
5  
6  
7

### 8 *Selection process*

9  
10 Screening will be performed in two stages. In Stage 1 we will screen titles & abstracts identified  
11 by the search strategy, followed in Stage 2 by the screening of the full-text articles which were  
12 deemed potentially relevant or of uncertain relevance during Stage 1 screening. The screening  
13 will be performed independently by two reviewers, and disagreements resolved with a third  
14 reviewer when necessary. We will use Distiller SR (a cloud-based, audit ready software for  
15 knowledge synthesis) to collect citations, remove duplicates, and screen titles and abstracts  
16 (stage 1).[62] Outcome measure relevance (at least one patient-centred outcome) will be used as  
17 an inclusion criterion at full-text screening only (Stage 2) and not during title and abstract  
18 screening, as this information is believed to be incompletely reported in the abstract. We will  
19 collect reasons for exclusions at the full-text screening stage. We will conduct pilot testing of the  
20 screening process on a set of 100 random citations for the title and abstract screening. We will  
21 report the results of the search and the study inclusion process in the manuscript reporting the  
22 results in a Preferred Reporting Items for Systematic Reviews and Meta-analyses extension for  
23 scoping review (PRISMA-ScR) flow diagram.[56]  
24  
25  
26  
27  
28  
29  
30  
31  
32  
33  
34  
35

36 We will integrate innovative strategies to increase the efficiency of the screening process  
37 considering the large number of expected citations and trials.[63] For stage 1, we will use  
38 Distiller SR's artificial intelligence (AI) active-machine learning feature to prioritize title and  
39 abstract screening of citations.[64, 65] This method has been validated.[65] This active-machine  
40 learning feature will allow us to perform prioritized screening, as a relevance score will be  
41 generated for each citation during an initial training exercise on a sample of approximately 200  
42 citations; this feature will continue to learn throughout the stage 1 screening process, presenting  
43 reviewers with the most relevant citations first. Once we have reached a predicted recall rate of  
44 90% (meaning that the active machine learning predicts we will have identified approximately  
45 90% of included RCTs), the AI tool will replace one of the reviewers in our duplicate screening  
46 process, and will be instructed to exclude all remaining citations. These citations will still be  
47 inspected by a human reviewer, and when there is a disagreement for a citation between the  
48  
49  
50  
51  
52  
53  
54  
55  
56  
57  
58  
59  
60

1  
2  
3 reviewer and the AI tool, a second human reviewer will participate to reach consensus. We will  
4 conduct ongoing conflict resolution throughout stage 1 screening to maintain strong performance  
5 of the AI tool. For full text screening (stage 2), we will use the insightScope platform  
6  
7 ([www.insightscope.ca](http://www.insightscope.ca)), a web-based application that allows creation of a large online team to  
8 facilitate screening.[66] Prior to beginning full text screening, each incoming reviewer will need  
9 to complete a test set (n=50 citations) and achieve at least 80% sensitivity for included articles  
10 compared with a gold standard. The gold standard will be established a priori by two expert  
11 reviewers.  
12  
13  
14  
15  
16  
17

### 18 *Data collection process*

19 We reviewed important concepts to be included in data charting with our patient panel and our  
20 knowledge users (Appendix 3, Steering committee and Stakeholder group) and developed a draft  
21 data abstraction form with our patient panel, methodological and clinical experts. It will be pilot  
22 tested by two reviewers using a sample of five reports, prior to initiation of data collection for the  
23 full set of included studies. Two reviewers will abstract the data independently using a  
24 standardized data extraction form in the insightScope platform.[67] Authors will be contacted if  
25 relevant data or information is missing.  
26  
27  
28  
29  
30  
31  
32  
33

### 34 *Data items*

35 To address our primary aim of characterizing the RCT evidence assessing pharmacologic  
36 intraoperative opioid minimization strategies and identify promising strategies, we will extract  
37 data on the publication (author, year of publication, country), the intervention; including the  
38 category of opioid minimization strategy (N-Methyl-D-aspartate receptor antagonists,  
39 anticonvulsant, acetaminophen, corticosteroids, alpha-2 adrenergic agonists, beta-adrenergic  
40 antagonists, and other),[68, 69] whether the intervention involved multiple medications  
41 (combination) vs. only one medication, the timing of administration (intraoperative vs.  
42 intraoperative and postoperative period), and the reported patient-centred outcome measures  
43 (domains and instruments). Other data to be extracted will include the type of randomization  
44 (group unit vs. individual unit) and method (type of comparator, type of surgery, multicentre vs.  
45 one centre, registered protocol, sample size, adverse events reported, funding source, sex, gender  
46 and genetic considerations), study population characteristics (age group, opioid use or chronic  
47  
48  
49  
50  
51  
52  
53  
54  
55  
56  
57

1  
2  
3 pain history), as well as implementation barriers previously identified, such as the mode of  
4 administration of the pharmacologic strategy.[70]  
5  
6  
7

8 To address our secondary aim of synthesizing the reported patient-centred outcomes, we will  
9 categorize each patient-centred outcome measure according to the Standardised Endpoints in  
10 Perioperative Medicine initiative (StEP-COMPAC group perioperative framework) domains (i.e.  
11 well-being, functional outcomes, patient satisfaction, quality of life, and life impact).[71] We  
12 will also capture long-term opioid use, opioid-related adverse effects (multidimensional  
13 assessment), acute pain (multidimensional assessment), and postoperative chronic pain  
14 separately.[72, 73]  
15  
16  
17  
18  
19  
20  
21

### 22 **Data synthesis and outcome prioritization**

23 The analysis of our primary aim of characterizing the RCT evidence assessing patient-centred  
24 effectiveness of pharmacologic intraoperative opioid minimization strategies will be descriptive  
25 and will include the use of summary figures, tables, and charts. First, we will collate and present  
26 in tables the number of RCTs assessing each pharmacologic opioid minimization strategy  
27 identified, as well as important methods and design characteristics of those RCTs. Second, we  
28 will further describe the pharmacologic opioid minimization strategies; including the category of  
29 pharmacologic agent involved, the timing of administration of the intervention, and the number  
30 of pharmacologic agents involved in each strategy. We will report the number of trials (bubble  
31 size) assessing each class of opioid minimization strategies (y-axis) as a function of the reported  
32 domain of patient-centred outcome (x-axis) using bubble plots. Third, we will characterize the  
33 significance of the patient-centred results from each of the RCTs. More specifically, we will  
34 classify each RCT and its pharmacologic opioid minimization strategy as being beneficial (eg.  
35 promising), equivocal, not effective, or potentially deleterious based on patient-centred outcomes  
36 reported and author's conclusion.[74] In cases of inconsistency in results, we will hold nominal  
37 group discussions with our identified interested parties (Appendix 3, Steering committee) to  
38 determine which pharmacologic strategies are the most promising.[75] Our a priori prioritization  
39 of patient-centred outcome measure instruments will help guide reporting and interpreting of  
40 findings (Table 1).[76, 77]  
41  
42  
43  
44  
45  
46  
47  
48  
49  
50  
51  
52  
53  
54  
55  
56  
57  
58  
59  
60



**Table 1. StEP-COMPAC group recommendations for patient-centred outcome assessments in perioperative clinical trials[47] and our prioritization order tailored to pharmacologic interventions**

|                                                                           | Patient-centred outcome domains |                                                                         |                                                     |                                         |                                                                                                  |
|---------------------------------------------------------------------------|---------------------------------|-------------------------------------------------------------------------|-----------------------------------------------------|-----------------------------------------|--------------------------------------------------------------------------------------------------|
|                                                                           | Patient well-being              | Health-related quality of life                                          | Functional outcome                                  | Patient satisfaction                    | Life impact                                                                                      |
| <b>Instruments to be prioritized based on StEP-COMPAC recommendations</b> | Quality of recovery-15 [78]     | EuroQol 5 Dimension, five-level version with visual analogue scale [79] | WHO Disability Assessment Schedule version 2.0 [80] | Bauer patient-satisfaction measure [81] | Days alive and out of hospital after surgery (at 30 days and one year) and discharge destination |
| <b>Prioritization by our team (Steering committee)<sup>1</sup></b>        | 1                               | 2                                                                       | 3                                                   | 4                                       | 5                                                                                                |

<sup>1</sup>Prioritization based on a) Plausibility for effect between intraoperative pharmacologic intervention and outcome b) Patient and knowledge user priority

For our secondary aim of synthesising reported patient-centred outcomes in RCTs evaluating pharmacologic intraoperative opioid minimization strategies, we will categorize RCTs based on 7 outcome domains (five from StEOP-COMPAC initiative and two from our Steering committee), namely: well-being, functional outcomes, patient satisfaction, quality of life, life impact, opioid-related (long-term opioid use and multidimensional assessment of opioid-related adverse effects), and pain-related (multidimensional acute pain, and postoperative chronic pain). We will present results for individual RCTs and the number of RCTs that reported each outcome measure classified by domain. We will report the proportion of published RCTs that reported on

1  
2  
3 instruments deemed to be important by the StEP-COMPAC group recommendations (Table 1).  
4 We will also report if sex, gender and genetic were accounted for in the analyses and outcome  
5 assessments.[70]  
6  
7  
8  
9

### 10 **Patient and public involvement**

11 Recognizing the need to have the patient voice on the investigative team, our study team includes  
12 a patient panel of four individuals with lived perioperative experience. For this collaborative  
13 work, we are following the principles laid out in the Strategy for Patient-Oriented Research  
14 (SPOR) Patient Engagement Framework which aims at optimizing collaborative partnerships  
15 between researchers and lay people or organizations.[82] In line with these principles of  
16 inclusiveness, support, mutual respect, and co-building, we (the patient panel and research leads)  
17 have met numerous times. Each meeting is co-led with a patient-oriented research facilitator  
18 (Nicholls), and we are using first names to facilitate communication and reduce power  
19 imbalance. We have also co-developed terms of reference for the patient panel to inform and  
20 guide the ongoing engagement (<https://osf.io/afm3z/>). Our patient engagement approach and  
21 work are described in another publication (manuscript accepted, publication pending).  
22  
23  
24  
25  
26  
27  
28  
29  
30  
31

32 To date, we have developed the protocol through discussions and written comments, including  
33 assessment of the relevance of the scope of the review, the outcomes, the plain language abstract,  
34 the planned items for extraction and national grant application. We anticipate ongoing  
35 collaboration to assist with the prioritization of outcomes and interventions as well as  
36 interpretation of results and facilitating evidence translation and dissemination of our findings  
37 (interaction with other interested parties, co-developing an abstract, advertisements on social  
38 media, etc.). We have sought to build strong and sustainable relationships through transparency  
39 (mutual goals agreed on), commitment, regular communication and feedback (email updates,  
40 group discussion), and ongoing evaluation (Public and Patient Engagement Evaluation tool  
41 [PPEET] survey administered to ensure satisfaction and obtain feedback).[83]  
42  
43  
44  
45  
46  
47  
48  
49  
50

51 We are also engaging several organizations as knowledge users, namely: SolvingPain  
52 (<https://www.solvingpain.ca>), Pain BC (<https://painbc.ca>), Health Canada  
53 (<https://www.canada.ca/en/health-canada.html>), Réseau Québécois de Recherche sur la Douleur  
54  
55  
56  
57

1  
2  
3 (https://qprn.ca/fr/), Choosing Wisely (https://choosingwiselycanada.org), Strategy for Patient-  
4 Oriented Research (https://ossu.ca), the Canadian Anesthesia Society  
5 (<https://www.cas.ca/en/home>) and the Canadian Chronic Pain Network  
6 (<https://cpn.mcmaster.ca>). We have defined roles of our knowledge user organizations following  
7 a presentation and discussion with each of them as well as through a survey sent to each  
8 organization. Our scoping review is developed with the Canadian Perioperative Anesthesia  
9 Clinical Trials (PACT) group (<https://canadianpact.ca>), a collaborative research network in  
10 anesthesiology and perioperative care.  
11  
12  
13  
14  
15  
16  
17  
18

## 19 **ETHICS AND DISSEMINATION**

20 Our review does not require research ethics committee approval. To increase dissemination, our  
21 final manuscript reporting the results will be submitted for publication in open access, peer-  
22 reviewed journals. We will work with our knowledge user organizations and their networks to  
23 facilitate dissemination through websites, conference presentations, and social media platforms.  
24  
25  
26  
27  
28

## 29 **Acknowledgements**

30 We would like to thank Mrs. Risa Shorr (Information specialist at the Université of Ottawa) and  
31 M. Frederic Bergeron (information specialist at Université Laval) for their help in the  
32 development of the search strategy as well as all our knowledge user collaborators, namely:  
33 SolvingPain (<https://www.solvingpain.ca>), Pain BC (<https://painbc.ca>), Health Canada  
34 (<https://www.canada.ca/en/health-canada.html>), Réseau Québécois de Recherche sur la Douleur  
35 (<https://qprn.ca/fr/>), Choosing Wisely (<https://choosingwiselycanada.org>), Strategy for Patient-  
36 Oriented Research (<https://ossu.ca>), the Canadian Anesthesia Society  
37 (<https://www.cas.ca/en/home>), the Canadian Chronic Pain Network (<https://cpn.mcmaster.ca>), as  
38 well as the Canadian Perioperative Anesthesia Clinical Trials group (<https://canadianpact.ca>)  
39 for their help in refining the research question, their input on the design of the study as well as  
40 developing the dissemination plan.  
41  
42  
43  
44  
45  
46  
47  
48  
49  
50  
51  
52  
53  
54  
55  
56  
57  
58  
59  
60

## References

- [1] H. Shanthanna, K. S. Ladha, H. Kehlet, and G. P. Joshi, "Perioperative Opioid Administration: A Critical Review of Opioid-free versus Opioid-sparing Approaches," *Anesthesiology*, 2020, doi: 10.1097/ALN.0000000000003572.
- [2] R. Benyamin *et al.*, "Opioid complications and side effects," (in eng), *Pain Physician*, vol. 11, no. 2 Suppl, pp. S105-20, Mar 2008.
- [3] Y. Y. Chia, K. Liu, J. J. Wang, M. C. Kuo, and S. T. Ho, "Intraoperative high dose fentanyl induces postoperative fentanyl tolerance," (in eng), *Can J Anaesth*, vol. 46, no. 9, pp. 872-7, Sep 1999, doi: 10.1007/bf03012978.
- [4] V. Joly *et al.*, "Remifentanyl-induced postoperative hyperalgesia and its prevention with small-dose ketamine," (in eng), *Anesthesiology*, vol. 103, no. 1, pp. 147-55, Jul 2005, doi: 10.1097/00000542-200507000-00022.
- [5] D. R. Long *et al.*, "Association between intraoperative opioid administration and 30-day readmission: a pre-specified analysis of registry data from a healthcare network in New England," (in eng), *Br J Anaesth*, vol. 120, no. 5, pp. 1090-1102, May 2018, doi: 10.1016/j.bja.2017.12.044.
- [6] R. E. Abola *et al.*, "American Society for Enhanced Recovery and Perioperative Quality Initiative Joint Consensus Statement on Patient-Reported Outcomes in an Enhanced Recovery Pathway," (in eng), *Anesth Analg*, vol. 126, no. 6, pp. 1874-1882, Jun 2018, doi: 10.1213/ane.0000000000002758.
- [7] P. S. Myles *et al.*, "Systematic review and consensus definitions for the Standardised Endpoints in Perioperative Medicine (StEP) initiative: patient comfort," (in eng), *Br J Anaesth*, vol. 120, no. 4, pp. 705-711, Apr 2018, doi: 10.1016/j.bja.2017.12.037.
- [8] D. N. Wijeyesundera and S. R. Johnson, "How Much Better Is Good Enough?: Patient-reported Outcomes, Minimal Clinically Important Differences, and Patient Acceptable Symptom States in Perioperative Research," *Anesthesiology*, vol. 125, no. 1, pp. 7-10, 2016, doi: 10.1097/ALN.0000000000001159.
- [9] C. M. Brummett *et al.*, "New Persistent Opioid Use After Minor and Major Surgical Procedures in US Adults," (in eng), *JAMA Surg*, vol. 152, no. 6, p. e170504, Jun 21 2017, doi: 10.1001/jamasurg.2017.0504.
- [10] H. Kehlet, T. S. Jensen, and C. J. Woolf, "Persistent postsurgical pain: risk factors and prevention," (in eng), *Lancet*, vol. 367, no. 9522, pp. 1618-25, May 13 2006, doi: 10.1016/s0140-6736(06)68700-x.
- [11] A. A. Brescia *et al.*, "Impact of Prescribing on New Persistent Opioid Use After Cardiothoracic Surgery," (in eng), *Ann Thorac Surg*, vol. 108, no. 4, pp. 1107-1113, Oct 2019, doi: 10.1016/j.athoracsur.2019.06.019.
- [12] G. A. Brat *et al.*, "Postsurgical prescriptions for opioid naive patients and association with overdose and misuse: retrospective cohort study," (in eng), *Bmj*, vol. 360, p. j5790, Jan 17 2018, doi: 10.1136/bmj.j5790.
- [13] C. L. Wu *et al.*, "American Society for Enhanced Recovery and Perioperative Quality Initiative Joint Consensus Statement on Perioperative Opioid Minimization in Opioid-Naïve Patients," (in eng), *Anesth Analg*, vol. 129, no. 2, pp. 567-577, Aug 2019, doi: 10.1213/ane.0000000000004194.

- 1  
2  
3 [14] J. F. Waljee, L. Zhong, H. Hou, E. Sears, C. Brummett, and K. C. Chung, "The Use of  
4 Opioid Analgesics following Common Upper Extremity Surgical Procedures: A National,  
5 Population-Based Study," (in eng), *Plast Reconstr Surg*, vol. 137, no. 2, pp. 355e-364e,  
6 Feb 2016, doi: 10.1097/01.prs.0000475788.52446.7b.
- 7 [15] M. A. Raebel *et al.*, "Chronic opioid use emerging after bariatric surgery," (in eng),  
8 *Pharmacoepidemiol Drug Saf*, vol. 23, no. 12, pp. 1247-57, Dec 2014, doi:  
9 10.1002/pds.3625.
- 10 [16] M. A. Raebel *et al.*, "Chronic use of opioid medications before and after bariatric  
11 surgery," (in eng), *Jama*, vol. 310, no. 13, pp. 1369-76, Oct 2 2013, doi:  
12 10.1001/jama.2013.278344.
- 13 [17] J. Goesling *et al.*, "Trends and predictors of opioid use after total knee and total hip  
14 arthroplasty," (in eng), *Pain*, vol. 157, no. 6, pp. 1259-65, Jun 2016, doi:  
15 10.1097/j.pain.0000000000000516.
- 16 [18] M. C. Inacio, C. Hansen, N. L. Pratt, S. E. Graves, and E. E. Roughead, "Risk factors for  
17 persistent and new chronic opioid use in patients undergoing total hip arthroplasty: a  
18 retrospective cohort study," (in eng), *BMJ Open*, vol. 6, no. 4, p. e010664, Apr 29 2016,  
19 doi: 10.1136/bmjopen-2015-010664.
- 20 [19] G. M. Oderda *et al.*, "Cost of Opioid-Related Adverse Drug Events in Surgical Patients,"  
21 *Journal of Pain and Symptom Management*, vol. 25, no. 3, pp. 276-283, 2003, doi:  
22 10.1016/S0885-3924(02)00691-7.
- 23 [20] M. Wheeler, G. M. Oderda, M. A. Ashburn, and A. G. Lipman, "Adverse events  
24 associated with postoperative opioid analgesia: a systematic review," (in eng), *J Pain*,  
25 vol. 3, no. 3, pp. 159-80, Jun 2002, doi: 10.1054/jpai.2002.123652.
- 26 [21] R. J. Blendon and J. M. Benson, "The Public and the Opioid-Abuse Epidemic," *New*  
27 *England Journal of Medicine*, vol. 378, no. 5, pp. 407-411, 2018, doi:  
28 10.1056/NEJMp1714529.
- 29 [22] M. H. Fiona Campbell, Manon Choinière, Hani El-Gabalawy, Jacques Laliberté, Michael  
30 Sangster, Jaris Swidrovich, Linda Wilhelm. "Canadian Pain Task Force Report: March  
31 2021." [https://www.canada.ca/en/health-canada/corporate/about-health-canada/public-  
32 engagement/external-advisory-bodies/canadian-pain-task-force/report-2021.html](https://www.canada.ca/en/health-canada/corporate/about-health-canada/public-engagement/external-advisory-bodies/canadian-pain-task-force/report-2021.html)  
33 (accessed 2022).
- 34 [23] C. W. Canada. "Opioid Wisely." [https://choosingwiselycanada.org/campaign/opioid-  
35 wisely/](https://choosingwiselycanada.org/campaign/opioid-wisely/) (accessed).
- 36 [24] D. M. McKeen *et al.*, "Top ten priorities for anesthesia and perioperative research: a  
37 report from the Canadian Anesthesia Research Priority Setting Partnership," *Canadian*  
38 *Journal of Anesthesia/Journal canadien d'anesthésie*, vol. 67, no. 6, pp. 641-654,  
39 2020/06/01 2020, doi: 10.1007/s12630-020-01607-6.
- 40 [25] E. N. Brown, K. J. Pavone, and M. Naranjo, "Multimodal General Anesthesia: Theory  
41 and Practice," (in eng), *Anesth Analg*, vol. 127, no. 5, pp. 1246-1258, Nov 2018, doi:  
42 10.1213/ane.00000000000003668.
- 43 [26] V. Martinez, M. Carles, E. Marret, and H. Beloeil, "Perioperative use of gabapentinoids  
44 in France. Mismatch between clinical practice and scientific evidence," (in eng), *Anaesth*  
45 *Crit Care Pain Med*, vol. 37, no. 1, pp. 43-47, Feb 2018, doi:  
46 10.1016/j.accpm.2017.01.010.
- 47 [27] M. Verret *et al.*, "Perioperative Use of Gabapentinoids for the Management of  
48 Postoperative Acute Pain: A Systematic Review and Meta-analysis," (in eng),  
49  
50  
51  
52  
53  
54  
55  
56  
57  
58  
59  
60

- 1  
2  
3 *Anesthesiology*, vol. 133, no. 2, pp. 265-279, Aug 2020, doi:  
4 10.1097/aln.0000000000003428.
- 5 [28] A. Ollila, L. Vikatmaa, R. Sund, V. Pettilä, and E. Wilkman, "Efficacy and safety of  
6 intravenous esmolol for cardiac protection in non-cardiac surgery. A systematic review  
7 and meta-analysis," (in eng), *Ann Med*, vol. 51, no. 1, pp. 17-27, Feb 2019, doi:  
8 10.1080/07853890.2018.1538565.
- 9 [29] H. Blessberger *et al.*, "Perioperative beta-blockers for preventing surgery-related  
10 mortality and morbidity in adults undergoing non-cardiac surgery," (in eng), *Cochrane*  
11 *Database Syst Rev*, vol. 9, no. 9, p. Cd013438, Sep 26 2019, doi:  
12 10.1002/14651858.Cd013438.
- 13 [30] G. Blaudszun, C. Lysakowski, N. Elia, and M. R. Tramèr, "Effect of perioperative  
14 systemic  $\alpha_2$  agonists on postoperative morphine consumption and pain intensity:  
15 systematic review and meta-analysis of randomized controlled trials," (in eng),  
16 *Anesthesiology*, vol. 116, no. 6, pp. 1312-22, Jun 2012, doi:  
17 10.1097/ALN.0b013e31825681cb.
- 18 [31] L. Jessen Lundorf, H. Korvenius Nedergaard, and A. M. Møller, "Perioperative  
19 dexmedetomidine for acute pain after abdominal surgery in adults," (in eng), *Cochrane*  
20 *Database Syst Rev*, vol. 2, p. Cd010358, Feb 18 2016, doi:  
21 10.1002/14651858.CD010358.pub2.
- 22 [32] M. C. Sanchez Munoz, M. De Kock, and P. Forget, "What is the place of clonidine in  
23 anesthesia? Systematic review and meta-analyses of randomized controlled trials," (in  
24 eng), *J Clin Anesth*, vol. 38, pp. 140-153, May 2017, doi: 10.1016/j.jclinane.2017.02.003.
- 25 [33] E. C. Brinck *et al.*, "Perioperative intravenous ketamine for acute postoperative pain in  
26 adults," (in eng), *Cochrane Database Syst Rev*, vol. 12, no. 12, p. Cd012033, Dec 20  
27 2018, doi: 10.1002/14651858.CD012033.pub4.
- 28 [34] J. Saito and D. Ma, "Can dexmedetomidine protect against surgical stress response?," (in  
29 eng), *Clin Transl Med*, vol. 10, no. 2, Jun 28 2020, doi: 10.1002/ctm2.96.
- 30 [35] A. Zhu, H. A. Benzon, and T. A. Anderson, "Evidence for the Efficacy of Systemic  
31 Opioid-Sparing Analgesics in Pediatric Surgical Populations: A Systematic Review," (in  
32 eng), *Anesth Analg*, vol. 125, no. 5, pp. 1569-1587, Nov 2017, doi:  
33 10.1213/ane.0000000000002434.
- 34 [36] T. Husser, J. Marcom, J. Mark, J. Buonora, and B. Benham, "Effectiveness of non-opioid  
35 pharmacological adjuncts for adult surgical patients: an umbrella review protocol," (in  
36 eng), *JBIC Database System Rev Implement Rep*, vol. 17, no. 7, pp. 1319-1325, Jul 2019,  
37 doi: 10.11124/jbisrir-2017-003960.
- 38 [37] V. Martinez, H. Beloeil, E. Marret, D. Fletcher, P. Ravaud, and L. Trinquart, "Non-opioid  
39 analgesics in adults after major surgery: systematic review with network meta-analysis of  
40 randomized trials," *BJA: British Journal of Anaesthesia*, vol. 118, no. 1, pp. 22-31, 2016,  
41 doi: 10.1093/bja/aew391.
- 42 [38] J. F. Fiore, Jr. *et al.*, "Preventing opioid prescription after major surgery: a scoping  
43 review of opioid-free analgesia," (in eng), *Br J Anaesth*, vol. 123, no. 5, pp. 627-636,  
44 Nov 2019, doi: 10.1016/j.bja.2019.08.014.
- 45 [39] F. S. Meijer *et al.*, "Does nociception monitor-guided anesthesia affect opioid  
46 consumption? A systematic review of randomized controlled trials," (in eng), *J Clin*  
47 *Monit Comput*, vol. 34, no. 4, pp. 629-641, Aug 2020, doi: 10.1007/s10877-019-00362-4.
- 48  
49  
50  
51  
52  
53  
54  
55  
56  
57  
58  
59  
60

- 1  
2  
3 [40] S. Banerjee and D. MacDougall, "CADTH Rapid Response Reports," in *Nociception*  
4 *Monitoring for General Anesthesia: A Review of Clinical Effectiveness, Cost-*  
5 *Effectiveness, and Guidelines*. Ottawa (ON): Canadian Agency for Drugs and  
6 Technologies in Health. Copyright © 2018 Canadian Agency for Drugs and Technologies  
7 in Health., 2018.  
8  
9 [41] K. S. Ladha, E. Patorno, K. F. Huybrechts, J. Liu, J. P. Rathmell, and B. T. Bateman,  
10 "Variations in the Use of Perioperative Multimodal Analgesic Therapy," (in eng),  
11 *Anesthesiology*, vol. 124, no. 4, pp. 837-45, Apr 2016, doi:  
12 10.1097/aln.0000000000001034.  
13 [42] T. H. Stanley, "Opiate anaesthesia," (in eng), *Anaesth Intensive Care*, vol. 15, no. 1, pp.  
14 38-59, Feb 1987, doi: 10.1177/0310057x8701500107.  
15 [43] L. Kiliçkan and K. Toker, "The effect of preemptive intravenous morphine on  
16 postoperative analgesia and surgical stress response," (in eng), *Panminerva Med*, vol. 43,  
17 no. 3, pp. 171-5, Sep 2001.  
18 [44] R. P. Merkow *et al.*, "Underlying reasons associated with hospital readmission following  
19 surgery in the United States," (in eng), *Jama*, vol. 313, no. 5, pp. 483-95, Feb 3 2015, doi:  
20 10.1001/jama.2014.18614.  
21 [45] E. R. Kessler, M. Shah, S. K. Gruschus, and A. Raju, "Cost and quality implications of  
22 opioid-based postsurgical pain control using administrative claims data from a large  
23 health system: opioid-related adverse events and their impact on clinical and economic  
24 outcomes," (in eng), *Pharmacotherapy*, vol. 33, no. 4, pp. 383-91, Apr 2013, doi:  
25 10.1002/phar.1223.  
26 [46] C. Xuan *et al.*, "Efficacy of preemptive analgesia treatments for the management of  
27 postoperative pain: a network meta-analysis," *British Journal of Anaesthesia*, vol. 129,  
28 no. 6, pp. 946-958, 2022, doi: 10.1016/j.bja.2022.08.038.  
29 [47] S. R. Moonesinghe *et al.*, "Systematic review and consensus definitions for the  
30 Standardised Endpoints in Perioperative Medicine initiative: patient-centred outcomes,"  
31 (in eng), *Br J Anaesth*, vol. 123, no. 5, pp. 664-670, Nov 2019, doi:  
32 10.1016/j.bja.2019.07.020.  
33 [48] M. Z. Aromataris E. "JBI Manual for Evidence Synthesis."  
34 <https://synthesismanual.jbi.global>. <https://doi.org/10.46658/JBIMES-20-01> (accessed.  
35 [49] C. Pawliuk *et al.*, "Optimising the process for conducting scoping reviews," *BMJ*  
36 *Evidence-Based Medicine*, pp. bmjebm-2020-111452, 2020, doi: 10.1136/bmjebm-2020-  
37 111452.  
38 [50] D. Levac, H. Colquhoun, and K. K. O'Brien, "Scoping studies: advancing the  
39 methodology," *Implementation Science*, vol. 5, no. 1, p. 69, 2010/09/20 2010, doi:  
40 10.1186/1748-5908-5-69.  
41 [51] H. Arksey and L. O'Malley, "Scoping studies: towards a methodological framework,"  
42 *International Journal of Social Research Methodology*, vol. 8, no. 1, pp. 19-32,  
43 2005/02/01 2005, doi: 10.1080/1364557032000119616.  
44 [52] Z. Munn, M. D. J. Peters, C. Stern, C. Tufanaru, A. McArthur, and E. Aromataris,  
45 "Systematic review or scoping review? Guidance for authors when choosing between a  
46 systematic or scoping review approach," *BMC Medical Research Methodology*, vol. 18,  
47 no. 1, p. 143, 2018/11/19 2018, doi: 10.1186/s12874-018-0611-x.  
48 [53] K. T. Program. "What Review is Right for You?"  
49 <https://whatreviewisrightforyou.knowledgetranslation.net/map/form> (accessed.  
50  
51  
52  
53  
54  
55  
56  
57  
58  
59  
60

- 1  
2  
3 [54] M. D. J. Peters *et al.*, "Best practice guidance and reporting items for the development of  
4 scoping review protocols," (in eng), *JBI Evid Synth*, Jan 31 2022, doi: 10.11124/jbies-21-  
5 00242.  
6  
7 [55] D. Pollock *et al.*, "Moving from consultation to co-creation with knowledge users in  
8 scoping reviews: guidance from the JBI Scoping Review Methodology Group," *JBI*  
9 *Evidence Synthesis*, vol. 20, no. 4, pp. 969-979, 2022, doi: 10.11124/jbies-21-00416.  
10 [56] A. C. Tricco *et al.*, "PRISMA Extension for Scoping Reviews (PRISMA-ScR): Checklist  
11 and Explanation," *Annals of Internal Medicine*, vol. 169, no. 7, pp. 467-473, 2018/10/02  
12 2018, doi: 10.7326/M18-0850.  
13 [57] S. Staniszewska *et al.*, "GRIPP2 reporting checklists: tools to improve reporting of  
14 patient and public involvement in research," *BMJ*, vol. 358, p. j3453, 2017, doi:  
15 10.1136/bmj.j3453.  
16 [58] J. McGowan, M. Sampson, D. M. Salzwedel, E. Cogo, V. Foerster, and C. Lefebvre,  
17 "PRESS Peer Review of Electronic Search Strategies: 2015 Guideline Statement," (in  
18 eng), *J Clin Epidemiol*, vol. 75, pp. 40-6, Jul 2016, doi: 10.1016/j.jclinepi.2016.01.021.  
19 [59] J. L. Jackson *et al.*, "The Accuracy of Google Translate for Abstracting Data From Non-  
20 English-Language Trials for Systematic Reviews," (in eng), *Ann Intern Med*, vol. 171,  
21 no. 9, pp. 677-679, Nov 5 2019, doi: 10.7326/m19-0891.  
22 [60] Y. Takakusagi *et al.*, "Validation of the Reliability of Machine Translation for a Medical  
23 Article From Japanese to English Using DeepL Translator," *Cureus.*, vol. 13, no. 9, p.  
24 e17778. doi: 10.7759/cureus.17778. eCollection 2021 Sep., Sep 6 2021.  
25  
26 [61] G. o. Canada. "Roadmap for Open Science."  
27 [https://www.ic.gc.ca/eic/site/063.nsf/eng/h\\_97992.html](https://www.ic.gc.ca/eic/site/063.nsf/eng/h_97992.html) (accessed.  
28  
29 [62] C. Kohl *et al.*, "Online tools supporting the conduct and reporting of systematic reviews  
30 and systematic maps: a case study on CADIMA and review of existing tools,"  
31 *Environmental Evidence*, vol. 7, no. 1, p. 8, 2018/02/01 2018, doi: 10.1186/s13750-018-  
32 0115-5.  
33 [63] S. Boet *et al.*, "Mapping multicenter randomized controlled trials in anesthesiology: a  
34 scoping review," *Systematic Reviews*, vol. 10, no. 1, p. 276, 2021/10/26 2021, doi:  
35 10.1186/s13643-021-01776-5.  
36 [64] C. Hamel *et al.*, "Guidance for using artificial intelligence for title and abstract screening  
37 while conducting knowledge syntheses," *BMC Medical Research Methodology*, vol. 21,  
38 no. 1, p. 285, 2021/12/20 2021, doi: 10.1186/s12874-021-01451-2.  
39 [65] C. Hamel, S. E. Kelly, K. Thavorn, D. B. Rice, G. A. Wells, and B. Hutton, "An  
40 evaluation of DistillerSR's machine learning-based prioritization tool for title/abstract  
41 screening – impact on reviewer-relevant outcomes," *BMC Medical Research*  
42 *Methodology*, vol. 20, no. 1, p. 256, 2020/10/15 2020, doi: 10.1186/s12874-020-01129-1.  
43 [66] N. Nama *et al.*, "41 Validation of crowdsourcing for citation screening in systematic  
44 reviews," *BMJ Evidence-Based Medicine*, vol. 24, no. Suppl 1, pp. A26-A26, 2019, doi:  
45 10.1136/bmjebm-2019-EBMLive.49.  
46 [67] DistillerSR. <https://www.evidencepartners.com> (accessed. December 2022).  
47 [68] D. W. Creighton, A. H. Kumar, and S. A. Grant, "Perioperative Multimodal Pain  
48 Management: an Evidence-Based Update," *Current Anesthesiology Reports*, vol. 9, no. 3,  
49 pp. 295-307, 2019/09/01 2019, doi: 10.1007/s40140-019-00340-1.  
50 [69] K. Kumar, M. A. Kirksey, S. Duong, and C. L. Wu, "A Review of Opioid-Sparing  
51 Modalities in Perioperative Pain Management: Methods to Decrease Opioid Use  
52  
53  
54  
55  
56  
57  
58  
59  
60



- Postoperatively," *Anesth Analg*, vol. 125, no. 5, pp. 1749-1760, Nov 2017, doi: 10.1213/ANE.0000000000002497.
- [70] S. C. Rivera, D. G. Kyte, O. L. Aiyegbusi, A. L. Slade, C. McMullan, and M. J. Calvert, "The impact of patient-reported outcome (PRO) data from clinical trials: a systematic review and critical analysis," *Health and Quality of Life Outcomes*, vol. 17, no. 1, p. 156, 2019/10/16 2019, doi: 10.1186/s12955-019-1220-z.
- [71] S. R. Moonesinghe *et al.*, "Systematic review and consensus definitions for the Standardised Endpoints in Perioperative Medicine initiative: patient-centred outcomes," *Br J Anaesth*, vol. 123, no. 5, pp. 664-670, Nov 2019, doi: 10.1016/j.bja.2019.07.020.
- [72] M. L. Kent *et al.*, "American Society for Enhanced Recovery and Perioperative Quality Initiative-4 Joint Consensus Statement on Persistent Postoperative Opioid Use: Definition, Incidence, Risk Factors, and Health Care System Initiatives," (in eng), *Anesth Analg*, vol. 129, no. 2, pp. 543-552, Aug 2019, doi: 10.1213/ane.0000000000003941.
- [73] N. K. Jivraj *et al.*, "Persistent Postoperative Opioid Use: A Systematic Literature Search of Definitions and Population-based Cohort Study," *Anesthesiology*, vol. 132, no. 6, pp. 1528-1539, 2020, doi: 10.1097/ALN.0000000000003265.
- [74] N. Fazal, S. F. Jackson, K. Wong, J. Yessis, and N. Jetha, "Between worst and best: developing criteria to identify promising practices in health promotion and disease prevention for the Canadian Best Practices Portal," (in eng), *Health promotion and chronic disease prevention in Canada : research, policy and practice*, vol. 37, no. 11, pp. 386-392, 2017, doi: 10.24095/hpcdp.37.11.03.
- [75] C. f. D. C. a. Prevention. "Gaining Consensus Among Stakeholders Through the Nominal Group Technique." <https://www.cdc.gov/healthyyouth/evaluation/pdf/brief7.pdf> (accessed).
- [76] C. Snyder *et al.*, "Recommendations for including or reviewing patient reported outcome endpoints in grant applications," (in eng), *Bmj*, vol. 373, p. n1367, Jun 30 2021, doi: 10.1136/bmj.n1367.
- [77] M. Calvert *et al.*, "SPIRIT-PRO Extension explanation and elaboration: guidelines for inclusion of patient-reported outcomes in protocols of clinical trials," *BMJ Open*, vol. 11, no. 6, p. e045105, 2021, doi: 10.1136/bmjopen-2020-045105.
- [78] P. A. Stark, P. S. Myles, and J. A. Burke, "Development and Psychometric Evaluation of a Postoperative Quality of Recovery Score: The QoR-15," *Anesthesiology*, vol. 118, no. 6, pp. 1332-1340, 2013, doi: 10.1097/ALN.0b013e318289b84b.
- [79] M. Herdman *et al.*, "Development and preliminary testing of the new five-level version of EQ-5D (EQ-5D-5L)," (in eng), *Qual Life Res*, vol. 20, no. 10, pp. 1727-36, Dec 2011, doi: 10.1007/s11136-011-9903-x.
- [80] S. Federici, M. Bracalenti, F. Meloni, and J. V. Luciano, "World Health Organization disability assessment schedule 2.0: An international systematic review," (in eng), *Disabil Rehabil*, vol. 39, no. 23, pp. 2347-2380, Nov 2017, doi: 10.1080/09638288.2016.1223177.
- [81] M. Bauer, H. Böhler, G. Aichele, A. Bach, and E. Martin, "Measuring patient satisfaction with anaesthesia: perioperative questionnaire versus standardised face-to-face interview," (in eng), *Acta Anaesthesiol Scand*, vol. 45, no. 1, pp. 65-72, Jan 2001, doi: 10.1034/j.1399-6576.2001.450111.x.
- [82] S. f. P.-O. Research. "Strategy for Patient-Oriented Research: Patient Engagement Framework." [https://cihr-irsc.gc.ca/e/documents/spor\\_framework-en.pdf](https://cihr-irsc.gc.ca/e/documents/spor_framework-en.pdf) (accessed).

- 1  
2  
3 [83] T. L. Hall, C. Barrientos-Ortiz, G. Peña-Jackson, C. Fultineer, K. Werner, and J.  
4 Sunshine, "Facilitators and Barriers to Patient-Centered Outcomes Research Partnership  
5 Sustainability in the United States," (in eng), *J Patient Cent Res Rev*, vol. 8, no. 1, pp. 8-  
6 19, 2021, doi: 10.17294/2330-0698.1770.  
7  
8  
9  
10  
11  
12  
13  
14  
15  
16  
17  
18  
19  
20  
21  
22  
23  
24  
25  
26  
27  
28  
29  
30  
31  
32  
33  
34  
35  
36  
37  
38  
39  
40  
41  
42  
43  
44  
45  
46  
47  
48  
49  
50  
51  
52  
53  
54  
55  
56  
57  
58  
59  
60

For peer review only

**Authors contributions:**

Study question: MV, DF, ML, AFT, FZ, MG, ML, AG, PACT

Design and methodology: MV, DF, ML, AFT, FZ, MG, ML, AG, NHL, PACT

Develop search strategy: MV, DF, ML, AFT, NHL, RS

Drafting the manuscript: MV, DF, ML, NHL

Revise the manuscript: MV, DF, ML, AFT, FZ, MG, ML, AG, NHL, SS, MH, ALM, NF, SN,

DM, IG, BH, MB, PP, GM, JM, HM, RS, HD, PACT

Guide artificial intelligence feature for screening titles and abstracts: BH

Design data extraction form: MV, DF, ML, AFT, BL, FZ, MG, ML, AG, NHL

Lead patient engagement activities: MV, SN

Lead knowledge user partnership activities: MV, DF, ML

Screening, data abstraction, and data charting: MV, NHL, SS, MH, ALM, NF

All authors reviewed the content of the protocol and approved the final version.

**Data statement:**

Technical appendix and meta-data will be publicly available on Open Science Foundation (OSF) in our project file following the publication of the manuscript reporting the results.

**Funding statement:**

This work was supported by CIHR Project Grant, priority announcement: Patient-Oriented Research [480819] as well as a grant from the University of Ottawa Department of Anesthesiology and Pain Medicine. Michael Verret is supported by the Vanier Canada Graduate Scholarship Program from the CIHR, the FRQS/MSSS Resident Physician Health Research Training Program (phase 2), the Canadian Blood Services Graduate Fellowship Program and the McLaughlin Dean's Award from Université Laval. Manoj Lalu is supported by University of Ottawa Junior Clinical Research Chair, Canadian Anesthesiologist's Career Scientist Award, and the The Ottawa Hospital Anesthesia Alternate Funds Association. Méanie Bérubé is the recipient of salary support awards from the Fonds de Recherche en Santé-Québec (FRQS) and the Strategy for Patient-Oriented Research-Quebec.

1  
2  
3 **Competing interest statement:** Dr Ian Gilron has received consulting fees from GW Research,  
4 Eupraxia, Biogen, and Novaremed.  
5

6 **Patient and public involvement:** Patients were involved in the design, conduct, and reporting  
7 plans of this research. Refer to the Methods and patient and public involvement sections for  
8 further details.  
9

10  
11 **Provenance and peer review:** This study was peer reviewed by the Canadian Institute Health  
12 and Research (CIHR) organization.  
13  
14  
15

16  
17  
18  
19  
20  
21  
22  
23  
24  
25  
26  
27  
28  
29  
30  
31  
32  
33  
34  
35  
36  
37  
38  
39  
40  
41  
42  
43  
44  
45  
46  
47  
48  
49  
50  
51  
52  
53  
54  
55  
56  
57  
58  
59  
60

For peer review only

## Appendix 1. Definitions

Intraoperative period: The moment between patient entrance in the operating room (OR) and the moment they leave the operating room. For our research program, pharmacologic interventions administered the same day of surgery and before patient's extubation will be considered as intraoperative based on mechanism of action and effect duration properties.

Intraoperative opioid minimization strategy: Any non-opioid drug with antinociceptive properties administered during the intraoperative period.

Intraoperative opioid-free anesthesia: A type of opioid minimization strategy with complete avoidance of opioids during surgery.

Multimodal strategies: The use of different classes of drugs, combining different action mechanisms aiming to reduce adverse effects and improving benefits.

Patient centred outcome domains: well-being, functional outcomes, patient satisfaction, quality of life, life impact, opioid-related, and pain-related.

Perioperative opioid free analgesia: A type of opioid minimization strategy with complete avoidance of opioids for pain management.

Systemic administration: Oral, intravenous, intramuscular or subcutaneous administration.

1  
2  
3  
4  
5  
6  
7  
8  
9  
10  
11  
12  
13  
14  
15  
16  
17  
18  
19  
20  
21  
22  
23  
24  
25  
26  
27  
28  
29  
30  
31  
32  
33  
34  
35  
36  
37  
38  
39  
40  
41  
42  
43  
44  
45  
46  
47  
48  
49  
50  
51  
52  
53  
54  
55  
56  
57  
58  
59  
60

For peer review only

**Appendix 2. List of class of drugs included and specific pharmacologic opioid minimization strategies examples**

| <b>Class of drugs</b>                | <b>Examples</b>                                                                                    |
|--------------------------------------|----------------------------------------------------------------------------------------------------|
| Anticonvulsants                      | Pregabalin<br>Gabapentin<br>Carbamazepine                                                          |
| Beta-adrenergic antagonist           | Esmolol<br>Metoprolol<br>Labetolol                                                                 |
| Alpha-2 receptor agonist             | Clonidine<br>Dexmedetomidine                                                                       |
| Methylxanthine                       | Caffeine                                                                                           |
| NMDA Receptor Antagonists            | Ketamine<br>Dextromethorphan<br>Magnesium                                                          |
| Corticosteroid/Glucocorticoid        | Dexamethasone<br>Methylprednisolone<br>Hydrocortisone<br>Prednisone                                |
| Antidepressants                      | Amitriptyline<br>Duloxetine<br>Tryptophan<br>Bicifadine<br>Fluoxetine<br>Venlafaxine<br>Citalopram |
| Local Anesthetic                     | Lidocaine                                                                                          |
| Anti-inflammatory (non-NSAID)        | Acetaminophen<br>Nefopam<br>Metamizol                                                              |
| Non opioid central analgesic         | Acetaminophen<br>Nefopam                                                                           |
| Ampyrone                             | Metamizole                                                                                         |
| Nonsteroidal Anti-inflammatory Drugs | Aspirin                                                                                            |

|                                  |                                                                                             |
|----------------------------------|---------------------------------------------------------------------------------------------|
|                                  | Ketorolac<br>Diclofenac<br>Naproxen<br>Ibuprofen<br>Nabumetone<br>Indomethacin<br>Piroxicam |
| COX-2 specific inhibitor (COXIB) | Celecoxib<br>Rofecoxib<br>Valdecoxib<br>Etoricoxib<br>Lumiracoxib                           |
| Cannabinoid                      | Nabilone<br>Cannabidiol                                                                     |



### Appendix 3. Interested parties

| Type of knowledge user                   | Interested parties identified                                                                   | Role in our scoping review               |
|------------------------------------------|-------------------------------------------------------------------------------------------------|------------------------------------------|
| Practitioners and researchers            | Anesthesiologists<br>Surgeons<br>Nurses<br>Pain expert<br>Psychologist<br>Researcher<br>Trainee | Steering committee and stakeholder group |
| Patients                                 | Patient panel                                                                                   | Steering committee and stakeholder group |
| Patient organization                     | Strategy for Patient-Oriented Research (SPOR)                                                   | Stakeholder group                        |
| Policy makers                            | Health Canada<br>Choosing Wisely                                                                | Stakeholder group                        |
| Institutions                             | Department of Anesthesia and Pain Medicine (University of Ottawa)                               | Stakeholder group                        |
| Interdisciplinary organization           | Pain BC<br>Solving Pain<br>Réseau Québécois de Recherche sur la Douleur<br>Chronic Pain Network | Stakeholder group                        |
| Researcher and practitioner organization | Perioperative Anesthesia<br>Clinical Trials group<br>Canadian Anesthesia Society                | Stakeholder group                        |

#### Appendix 4. Search strategy for MEDLINE/Ovid

1 exp Surgical Procedures, Operative/  
 2 su.fs. or (surger\* or surgical\*).tw,kf.  
 3 (curettage or debridement or electrosurger\* or fasciotom\* or Keratectom\* or laparotom\*  
 4 or lymph node excision or mastectom\* or metastasectom\* or microsurger\* or myotom\*  
 5 or neurosurgical procedure\* or orthopedic procedure\* or amputation or Osteotom\* or  
 6 pelvic exenteration or pneumonectom\* or prosthesis implantation or reoperation or  
 7 splenectom\* or symphysiotom\* or transplantation).tw,kf.  
 8 or/1-3  
 9 ((opioid\* or opiate\*) adj3 (sparing or minimi?ation or free)).tw,kf.  
 10 (multimodal adj5 (an?esthes\* or analges\*)).tw,kf.  
 11 5 or 6  
 12 analgesics/ or exp analgesics, non-narcotic/  
 13 exp Adrenergic alpha-2 Receptor Agonists/  
 14 Caffeine/  
 15 exp anti-inflammatory agents/  
 16 exp Adrenal Cortex Hormones/  
 17 exp Cyclooxygenase 2 Inhibitors/  
 18 exp Adrenergic beta-Antagonists/  
 19 Receptors, N-Methyl-D-Aspartate/ai [Antagonists & Inhibitors]  
 20 magnesium compounds/ or magnesium sulfate/  
 21 exp Anticonvulsants/  
 22 (Lidocaine or Alpha-2 Receptor Agonist\* or Caffeine or Corticosteroid\* or Beta block\*  
 23 or NMDA receptor antagonist\* or Magnesium or Acetaminophen or NSAID\* or Anti-  
 24 convulsant\* or anticonvulsant\* or Antidepressant\* or gabapentinoid\* or cox-2  
 25 inhibitor\*).tw,kf.  
 26 Dexmedetomidine/ or lidocaine/ or ketamine/ or Propanolamines/ or Clonidine/  
 27 (Pregabalin or Gabapentin or Carbamazepine or Carbazepin or Esmolol or  
 28 Propanolamine\* or Metoprolol or Labetolol or Clonidine or Dexmedetomidine or  
 29 Catapressan or Caffeine or Ketamine or Dextromethorphan or Dexamethasone or  
 30 Methylprednisolone or hydrocortison\* or Prednisone or magnesium or Amitriptyline or  
 31 Duloxetine or Tryptophan or Bicifadine or Desipramine or fluoxetine or Venlafaxine or  
 32 Citalopram).ti.  
 33 or/8-20  
 34 perioperative period/ or intraoperative period/ or exp Administration, Intravenous/ or  
 35 Combined Modality Therapy/  
 36 (perioperat\* or peri operat\* or intra operat\* or intraoperat\*).tw,kf.  
 37 (an?esthes\* adj2 induction).tw,kf.  
 38 or/22-24  
 39 21 and 25  
 40 7 or 26  
 41 4 and 27  
 42 randomized controlled trial.pt.  
 43 controlled clinical trial.pt.  
 44 random\*.tw.

1  
2  
3  
4  
5  
6  
7  
8  
9  
10  
11  
12  
13  
14  
15  
16  
17  
18  
19  
20  
21  
22  
23  
24  
25  
26  
27  
28  
29  
30  
31  
32  
33  
34  
35  
36  
37  
38  
39  
40  
41  
42  
43  
44  
45  
46  
47  
48  
49  
50  
51  
52  
53  
54  
55  
56  
57  
58  
59  
60

32 placebo.ab.  
33 clinical trials as topic.sh.  
34 trial.ti.  
35 or/29-34  
36 exp animals/ not humans/  
37 35 not 36  
38 28 and 37  
39 38 use medall

For peer review only

### Search strategy for Embase

- 40 exp \*surgery/  
41 (surg\* or surgical\*).tw.  
42 (curettage or debridement or electrosurger\* or fasciotom\* or Keratectom\* or laparotom\* or lymph node excision or mastectom\* or metastasectom\* or microsurger\* or myotom\* or neurosurgical procedure\* or orthopedic procedure\* or amputation or Osteotom\* or pelvic exenteration or pneumonectom\* or prosthesis implantation or reoperation or splenectom\* or symphysiotom\* or transplantation).tw.  
43 40 or 41 or 42  
44 ((opioid\* or opiate\*) adj3 (sparing or minimi?ation or free)).tw.  
45 (multimodal adj5 (an?esthes\* or analges\*)).tw.  
46 44 or 45  
47 exp \*analgesic agent/  
48 exp \*alpha 2 adrenergic receptor stimulating agent/  
49 \*caffeine/  
50 exp \*antiinflammatory agent/  
51 exp \*corticosteroid/  
52 exp \*cyclooxygenase 2 inhibitor/  
53 exp \*beta adrenergic receptor blocking agent/  
54 exp \*n methyl dextro aspartic acid receptor stimulating agent/  
55 \*magnesium/  
56 \*magnesium sulfate/  
57 exp \*anticonvulsive agent/  
58 (Lidocaine or Alpha-2 Receptor Agonist\* or Caffeine or Corticosteroid\* or Beta block\* or NMDA receptor antagonist\* or Magnesium or Acetaminophen or NSAID\* or Anti-convulsant\* or anticonvulsant\* or Antidepressant\* or gabapentinoid\* or cox-2 inhibitor\*).tw.  
59 \*dexmedetomidine/  
60 \*lidocaine/  
61 \*ketamine/

1  
2  
3 62 \*propranolamine derivative/  
4  
5 63 \*clonidine/  
6  
7 64 (Pregabalin or Gabapentin or Carbamazepine or Carbazepin or Esmolol or  
8 Propranolamine\* or Metoprolol or Labetolol or Clonidine or Dexmedetomidine or  
9 Catapressan or Caffeine or Ketamine or Dextromethorphan or Dexamethasone or  
10 Methylprednisolone or hydrocortison\* or Prednisone or magnesium or Amitriptyline or  
11 Duloxetine or Tryptophan or Bicifadine or Desipramine or fluoxetine or Venlafaxine or  
12 Citalopram).ti.  
13  
14  
15 65 or/47-64  
16  
17 66 \*perioperative period/  
18  
19 67 intraoperative period/  
20  
21 68 (perioperat\* or peri operat\* or intra operat\* or intraoperat\*).tw.  
22  
23 69 anesthesia induction/  
24  
25 70 \*intravenous drug administration/  
26  
27 71 (an?esthes\* adj1 induction).tw.  
28  
29 72 or/66-71  
30  
31 73 65 and 72  
32  
33 74 46 or 73  
34  
35 75 43 and 74  
36  
37 76 random\*.tw. or placebo\*.mp. or double-blind\*.tw. or trial.ti.  
38  
39 77 75 and 76  
40  
41 78 (exp animal/ or nonhuman/) not exp human/  
42  
43 79 77 not 78  
44  
45 80 79 use emczd  
46  
47  
48  
49  
50  
51  
52  
53  
54  
55  
56  
57  
58  
59  
60

### Search strategy for CENTRAL

- 1  
2  
3  
4  
5  
6  
7  
8  
9  
10  
11  
12  
13  
14  
15  
16  
17  
18  
19  
20  
21  
22  
23  
24  
25  
26  
27  
28  
29  
30  
31  
32  
33  
34  
35  
36  
37  
38  
39  
40  
41  
42  
43  
44  
45  
46  
47  
48  
49  
50  
51  
52  
53  
54  
55  
56  
57  
58  
59  
60
- 81 exp Surgical Procedures, Operative/  
82 su.fs. or (surger\* or surgical\*).tw,kw.  
83 (curettage or debridement or electrosurger\* or fasciotom\* or Keratectom\* or laparotom\*  
or lymph node excision or mastectom\* or metastasectom\* or microsurger\* or myotom\*  
or neurosurgical procedure\* or orthopedic procedure\* or amputation or Osteotom\* or  
pelvic exenteration or pneumonectom\* or prosthesis implantation or reoperation or  
splenectom\* or symphysiotom\* or transplantation).tw,kw.  
84 or/81-83  
85 ((opioid\* or opiate\*) adj3 (sparing or minimi?ation or free)).tw,kw.  
86 (multimodal adj5 (an?esthes\* or analges\*)).tw,kw.  
87 85 or 86  
88 analgesics/ or exp analgesics, non-narcotic/  
89 exp Adrenergic alpha-2 Receptor Agonists/  
90 Caffeine/  
91 exp anti-inflammatory agents/  
92 exp Adrenal Cortex Hormones/  
93 exp Cyclooxygenase 2 Inhibitors/  
94 exp Adrenergic beta-Antagonists/  
95 Receptors, N-Methyl-D-Aspartate/ai [Antagonists & Inhibitors]  
96 magnesium compounds/ or magnesium sulfate/  
97 exp Anticonvulsants/  
98 (Lidocaine or Alpha-2 Receptor Agonist\* or Caffeine or Corticosteroid\* or Beta block\*  
or NMDA receptor antagonist\* or Magnesium or Acetaminophen or NSAID\* or Anti-  
convulsant\* or anticonvulsant\* or Antidepressant\* or gabapentinoid\* or cox-2  
inhibitor\*).tw,kw.  
99 Dexmedetomidine/ or lidocaine/ or ketamine/ or Propanolamines/ or Clonidine/  
100 (Pregabalin or Gabapentin or Carbamazepine or Carbazepin or Esmolol or  
Propanolamine\* or Metoprolol or Labetolol or Clonidine or Dexmedetomidine or  
Catapressan or Caffeine or Ketamine or Dextromethorphan or Dexamethasone or  
Methylprednisolone or hydrocortison\* or Prednisone or magnesium or Amitriptyline or

Duloxetine or Tryptophan or Bicyclanil or Desipramine or fluoxetine or Venlafaxine or Citalopram).ti.

101 or/88-100

102 perioperative period/ or intraoperative period/ or exp Administration, Intravenous/ or Combined Modality Therapy/

103 (perioperat\* or peri operat\* or intra operat\* or intraoperat\*).tw,kw.

104 (an?esthes\* adj2 induction).tw,kw.

105 or/102-104

106 101 and 105

107 87 or 106

108 84 and 107

109 108 use cctr

110 39 or 80 or 109

## Search strategy for Web of science

1. (TS=(surg\*)) OR TS=(( curettage or debridement or electrosurger\* or fasciotom\* or Keratectom\* or laparotom\* or lymph node excision or mastectom\* or metastasectom\* or microsurger\* or myotom\* or neurosurgical procedure\* or orthopedic procedure\* or amputation or Osteotom\* or pelvic exenteration or pneumonectom\* or prosthesis implantation or reoperation or splenectom\* or symphysiotom\* or transplantation ))
2. TS((((opioid\* or opiate\*) NEAR/3 (sparing or minimi?ation or free)))
3. (TS=(multimodal NEAR/5 (an\$esthes\* or analges\*)))
4. (#2) OR #3
5. (TS=(nonnarcotic analges\* )) OR TS=(non narcotic analges\*)
6. TS=((Pregabalin or Gabapentin or Carbamazepine or Carbazepin or Esmolol or Propranolamine\* or Metoprolol or Labetolol or Clonidine or Dexmedetomidine or Catapressan or Caffeine or Ketamine or Dextromethorphan or Dexamethasone or Methylprednisolone or hydrocortison\* or Prednisone or magnesium or Amitriptyline or Duloxetine or Tryptophan or Bicifadine or Desipramine or fluoxetine or Venlafaxine or Citalopram))
7. (TS=(Nonsteroid\* anti-inflammatory)) OR TS=(Nonsteroid\* antiinflammatory)
8. TS=((Lidocaine or Alpha-2 Receptor Agonist\* or Caffeine or Corticosteroid\* or Beta block\* or NMDA receptor antagonist\* or Magnesium or Acetaminophen or NSAID\* or Anti-convulsant\* or anticonvulsant\* or Antidepressant\* or gabapentinoid\* or cox-2 inhibitor\*))
9. (((#5) OR #6) OR #7) OR #8
10. TS=(intravenous) OR TS=(an\$esthes\* NEAR/2 induction)
11. ALL=(perioperat\* or peri operat\* or intra operat\* or intraoperat\*)
12. (#10) OR #11
13. (#9) AND #12
14. (#13) OR #4
15. (#1) AND #14
16. TS=((randomised OR randomized OR randomisation OR randomisation OR placebo\* OR (random\* AND (allocat\* OR assign\* ) OR (blind\* AND (single OR double OR treble OR triple) )) )
17. TS=((animal or animals or pisces or fish or fishes or catfish or catfishes or sheatfish or silurus or arius or heteropneustes or clarias or gariepinus or fathead minnow or fathead minnows



1  
2  
3 or pimephales or promelas or cichlidae or trout or trouts or char or chars or salvelinus or salmo  
4 or oncorhynchus or guppy or guppies or millionfish or poecilia or goldfish or goldfishes or  
5 carassius or auratus or mullet or mullets or mugil or curema or shark or sharks or cod or cods or  
6 gadus or morhua or carp or carps or cyprinus or carpio or killifish or eel or eels or anguilla or  
7 zander or sander or lucioperca or stizostedion or turbot or turbots or psetta or flatfish or flatfishes  
8 or plaice or pleuronectes or platessa or tilapia or tilapias or oreochromis or sarotherodon or  
9 common sole or dover sole or solea or zebrafish or zebrafishes or danio or rerio or seabass or  
10 dicentrarchus or labrax or morone or lamprey or lampreys or petromyzon or pumpkinseed or  
11 pumpkinseeds or lepomis or gibbosus or herring or clupea or harengus or amphibia or amphibian  
12 or amphibians or anura or salientia or frog or frogs or rana or toad or toads or bufo or xenopus or  
13 laevis or bombina or epidalea or calamita or salamander or salamanders or newt or newts or  
14 triturus or reptilia or reptile or reptiles or bearded dragon or pogona or vitticeps or iguana or  
15 iguanas or lizard or lizards or anguis fragilis or turtle or turtles or snakes or snake or aves or bird  
16 or birds or quail or quails or coturnix or bobwhite or colinus or virginianus or poultry or poultries  
17 or fowl or fowls or chicken or chickens or gallus or zebra finch or taeniopygia or guttata or  
18 canary or canaries or serinus or canaria or parakeet or parakeets or grasskeet or parrot or parrots  
19 or psittacine or psittacines or shelduck or tadorna or goose or geese or branta or leucopsis or  
20 woodlark or lullula or flycatcher or ficedula or hypoleuca or dove or doves or geopelia or  
21 cuneata or duck or ducks or greylag or graylag or anser or harrier or circus pygargus or red knot  
22 or great knot or calidris or canutus or godwit or limosa or lapponica or meleagris or gallopavo or  
23 jackdaw or corvus or monedula or ruff or philomachus or pugnax or lapwing or peewit or plover  
24 or vanellus or swan or cygnus or columbianus or bewickii or gull or chroicocephalus or  
25 ridibundus or albifrons or great tit or parus or aythya or fuligula or streptopelia or risoria or  
26 spoonbill or platalea or leucorodia or blackbird or turdus or merula or blue tit or cyanistes or  
27 pigeon or pigeons or columba or pintail or anas or starling or sturnus or owl or athene noctua or  
28 pochard or ferina or cockatiel or nymphius or hollandicus or skylark or alauda or tern or sterna  
29 or teal or crecca or oystercatcher or haematopus or ostralegus or shrew or shrews or sorex or  
30 araneus or crocidura or russula or european mole or talpa or chiroptera or bat or bats or eptesicus  
31 or serotinus or myotis or dasycneme or daubentonii or pipistrelle or pipistrellus or cat or cats or  
32 felis or catus or feline or dog or dogs or canis or canine or canines or otter or otters or lutra or  
33 badger or badgers or meles or fitchew or fitch or fougart or foulmart or ferrets or ferret or  
34 polecat or polecats or mustela or putorius or weasel or weasels or fox or foxes or vulpes or  
35 common seal or phoca or vitulina or grey seal or halichoerus or horse or horses or equus or  
36 equine or equidae or donkey or donkeys or mule or mules or pig or pigs or swine or swines or  
37 hog or hogs or boar or boars or porcine or piglet or piglets or sus or scrofa or llama or llamas or  
38 lama or glama or deer or deers or cervus or elaphus or cow or cows or bos taurus or bos indicus  
39 or bovine or bull or bulls or cattle or bison or bisons or sheep or sheeps or ovis aries or ovine or  
40 lamb or lambs or mouflon or mouflons or goat or goats or capra or caprine or chamois or  
41 rupicapra or leporidae or lagomorpha or lagomorph or rabbit or rabbits or oryctolagus or  
42 cuniculus or laprine or hares or lepus or rodentia or rodent or rodents or murinae or mouse or  
43 mice or mus or musculus or murine or woodmouse or apodemus or rat or rats or rattus or  
44 norvegicus or guinea pig or guinea pigs or cavia or porcellus or hamster or hamsters or  
45 mesocricetus or cricetus or cricetus or gerbil or gerbils or jird or jirds or meriones or  
46  
47  
48  
49  
50  
51  
52  
53  
54  
55  
56  
57  
58  
59  
60

1  
2  
3 unguiculatus or jerboa or jerboas or jaculus or chinchilla or chinchillas or beaver or beavers or  
4 castor fiber or castor canadensis or sciuridae or squirrel or squirrels or sciurus or chipmunk or  
5 chipmunks or marmot or marmots or marmota or suslik or susliks or spermophilus or cynomys  
6 or cottonrat or cottonrats or sigmodon or vole or voles or microtus or myodes or glareolus or  
7 primate or primates or prosimian or prosimians or lemur or lemurs or lemuridae or loris or bush  
8 baby or bush babies or bushbaby or bushbabies or galago or galagos or anthropoidea or  
9 anthropoids or simian or simians or monkey or monkeys or marmoset or marmosets or callithrix  
10 or cebuella or tamarin or tamarins or saguinus or leontopithecus or squirrel monkey or squirrel  
11 monkeys or saimiri or night monkey or night monkeys or owl monkey or owl monkeys or  
12 douroucoulis or aotus or spider monkey or spider monkeys or ateles or baboon or baboons or  
13 papio or rhesus monkey or macaque or macaca or mulatta or cynomolgus or fascicularis or green  
14 monkey or green monkeys or chlorocebus or vervet or vervets or pygerythrus or hominoidea or  
15 ape or apes or hylobatidae or gibbon or gibbons or siamang or siamangs or nomascus or  
16 symphalangus or hominidae or orangutan or orangutans or pongo or chimpanzee or chimpanzees  
17 or pan troglodytes or bonobo or bonobos or pan paniscus or gorilla or gorillas or troglodytes))

18. (#16) NOT #17

19. (#15) AND #18

## Search strategy for CINAHL

S1 (MH "Surgical Patients")

S2 (MH "Surgery, Operative+")

TI ( (curettage or debridement or electrosurger\* or fasciotom\* or Keratectom\* or laparotom\* or lymph node excision or mastectom\* or metastasectom\* or microsurger\* or myotom\* or neurosurgical procedure\* or orthopedic procedure\* or amputation or Osteotom\* or pelvic exenteration or pneumonectom\* or prosthesis implantation or reoperation or splenectom\* or symphysiotom\* or transplantation) ) OR AB ( (curettage or debridement or electrosurger\* or fasciotom\* or Keratectom\* or laparotom\* or lymph node excision or mastectom\* or metastasectom\* or microsurger\* or myotom\* or neurosurgical procedure\* or orthopedic procedure\* or amputation or Osteotom\* or pelvic exenteration or pneumonectom\* or prosthesis implantation or reoperation or splenectom\* or symphysiotom\* or transplantation) )

S4 TI surger\* OR AB surger\* OR TI surgical\* OR AB surgical\*

S5 S1 OR S2 OR S3 OR S4

S6 opioid\* N3 sparing OR opioid\* N3 minimi\* OR opioid\* N3 free

S7 opiate\* N3 sparing OR opiate\* N3 minimi\* OR opiate\* N3 free

S8 multimodal N5 an\*esthes OR multimodal N5 analges\*

S9 S6 OR S7 OR S8

S10 (MH "Analgesics") OR (MH "Analgesics, Nonnarcotic+") OR (MH "Anesthesia Adjuvants+")

S11 (MH "Adrenergic Beta-Agonists+")

S12 (MH "Caffeine")

S13 (MH "Antiinflammatory Agents+")

1  
2  
3  
4 S14 (MH "Adrenal Cortex Hormones+")  
5

6 S15 (MH "Adrenergic Beta-Antagonists+")  
7

8  
9 S16 (MH "Magnesium Compounds+")  
10

11 S17 (MH "Anticonvulsants+")  
12

13  
14 S18 (MH "Lidocaine")  
15

16 S19 (MH "Ketamine")  
17

18  
19 S20 "Dexmedetomidine"  
20

21  
22 S21 (MH "Propranolamines")  
23

24  
25 S22 (MH "Clonidine")  
26

27  
28 TI ( (Lidocaine or Alpha-2 Receptor Agonist\* or Caffeine or Corticosteroid\* or Beta  
29 block\* or NMDA receptor antagonist\* or N-Methyl-D-aspartate receptor antagonist\* or  
30 Magnesium or Acetaminophen or NSAID\* or Anti-convulsant\* or anticonvulsant\* or  
31 Antidepressant\* or gabapentinoid\* or cox-2 inhibitor\* or Nonsteroidal anti-inflammatory\*)  
32 ) OR AB ( (Lidocaine or Alpha-2 Receptor Agonist\* or Caffeine or Corticosteroid\* or  
33 Beta block\* or NMDA receptor antagonist\* or N-Methyl-D-aspartate receptor antagonist\*  
34 or Magnesium or Acetaminophen or NSAID\* or Anti-convulsant\* or anticonvulsant\* or  
35 Antidepressant\* or gabapentinoid\* or cox-2 inhibitor\* or Nonsteroidal anti-inflammatory\*)  
36 )  
37 S23 )  
38  
39

40  
41 TI (Pregabalin or Gabapentin or Carbamazepine or Carbamazepin or Esmolol or  
42 Propranolamine\* or Metoprolol or Labetolol or Clonidine or Dexmedetomidine or  
43 Catapressan or Caffeine or Ketamine or Dextromethorphan or Dexamethasone or  
44 Methylprednisolone or hydrocortison\* or Prednisone or magnesium or Amitriptyline or  
45 Duloxetine or Tryptophan or Bicifadine or Desipramine or fluoxetine or Venlafaxine or  
46 S24 Citalopram)  
47  
48

49 S10 OR S11 OR S12 OR S13 OR S14 OR S15 OR S16 OR S17 OR S18 OR S19 OR S20  
50 S25 OR S21 OR S22 OR S23 OR S24  
51

52  
53 S26 (MH "Intraoperative Period")  
54  
55  
56  
57  
58  
59  
60

- 1  
2  
3  
4 S27 (MH "Administration, Intravenous")  
5  
6 S28 (MH "Combined Modality Therapy")  
7  
8  
9 TI ( (perioperat\* or peri operat\* or intra operat\* or intraoperat\* ) OR AB ( (perioperat\* or  
10 S29 peri operat\* or intra operat\* or intraoperat\* ) )  
11  
12  
13 S30 TI an\*esthes\* N2 induction OR AB an?esthes\* N2 induction  
14  
15 S31 (MH "Anesthesia Induction")  
16  
17  
18 S32 S26 OR S27 OR S28 OR S29 OR S30 OR S31  
19  
20  
21 S33 S25 AND S32  
22  
23  
24 S34 S9 OR S33  
25  
26 S35 S5 AND S34  
27  
28  
29 (MH "Randomized Controlled Trials+") OR (MH "Double-Blind Studies") OR (MH  
30 S36 "Triple-Blind Studies") OR (MH "Clinical Trials")  
31  
32  
33 S37 TI random\* OR AB random\* OR TI placebo OR AB placebo OR TI trial  
34  
35  
36 S38 (control W5 group)  
37  
38 S39 (MH "Random Assignment")  
39  
40  
41 S40 S36 OR S37 OR S38 OR S39  
42  
43 S41 S35 AND S40  
44  
45  
46 S42 (MH "Animals+")  
47  
48  
49 S43 (MH "Animal Studies")  
50  
51  
52 S44 TI animal model\*  
53  
54 S45 S42 OR S43 OR S44  
55  
56  
57  
58  
59  
60

1  
2  
3  
4 S46 (MH "Human")  
5

6 S47 S45 NOT S46  
7

8  
9 S48 S41 NOT S47  
10

11  
12 S49 S41 NOT S47  
13  
14  
15  
16  
17  
18  
19  
20  
21  
22  
23  
24  
25  
26  
27  
28  
29  
30  
31  
32  
33  
34  
35  
36  
37  
38  
39  
40  
41  
42  
43  
44  
45  
46  
47  
48  
49  
50  
51  
52  
53  
54  
55  
56  
57  
58  
59  
60

For peer review only
