# Supplementary material for: Intraoperative pharmacologic opioid minimisation strategies and patient-centred outcomes after surgery: a scoping review protocol
Source: PubMed Central journal article supplement — BMJ Open. 2023 Mar 1;13(3):e070748. doi: 10.1136/bmjopen-2022-070748 (PMC9980324; doi:10.1136/bmjopen-2022-070748), 2023-03-01
Supplement: bmjopen-2022-070748.reviewer_comments.pdf [file bmjopen-2022-070748.reviewer_comments.pdf]

## PEER REVIEW HISTORY

BMJ Open publishes all reviews undertaken for accepted manuscripts. Reviewers are asked to complete a checklist review form (<http://bmjopen.bmj.com/site/about/resources/checklist.pdf>) and are provided with free text boxes to elaborate on their assessment. These free text comments are reproduced below.

## ARTICLE DETAILS

|                            |                                                                                                                                                                                                                                                                                                                                                                                                                                                                                                                    |
|----------------------------|--------------------------------------------------------------------------------------------------------------------------------------------------------------------------------------------------------------------------------------------------------------------------------------------------------------------------------------------------------------------------------------------------------------------------------------------------------------------------------------------------------------------|
| <b>TITLE (PROVISIONAL)</b> | Intraoperative pharmacologic opioid minimization strategies and patient-centred outcomes after surgery: a scoping review protocol                                                                                                                                                                                                                                                                                                                                                                                  |
| <b>AUTHORS</b>             | Verret, Michael; Lam, Nhat Hung; Fergusson, Dean; Nicholls, Stuart; Turgeon, Alexis; McIsaac, Daniel; Gilron, Ian; Hamtiaux, Myriam; Srichandramohan, Sriyathavan; Al-Mazidi, Abdulaziz; A. Fergusson, Nicholas; Hutton, Brian; Zivkovic, Fiona; Graham, Megan; Geist, Allison; Le, Maxime; Berube, Melanie; Poulin, Patricia; Shorr, Risa; Daudt, Helena; Martel, Guillaume; McVicar, Jason; Moloo, Husein; Lalu, Manoj; Perioperative Anesthesia Clinical Trials Group, Perioperative Anesthesia Clinical Trials |

This article was not externally reviewed at BMJ Open. Protocols that have been independently assessed prior to submission to BMJ Open are usually fast-tracked to publication on the grounds that further substantial changes will not be possible. This independent assessment will usually be external, independent review for both a substantial grant award from a non-commercial or government funder and ethics approval.
