# Supplementary material for: Intraoperative pharmacologic opioid minimisation strategies and patient-centred outcomes after surgery: a scoping review protocol
Source: PubMed Central journal article supplement — BMJ Open. 2023 Mar 1;13(3):e070748. doi: 10.1136/bmjopen-2022-070748 (PMC9980324; doi:10.1136/bmjopen-2022-070748), 2023-03-01
Supplement: bmjopen-2022-070748supp002.pdf [file bmjopen-2022-070748supp002.pdf]

**Appendix 2. List of class of drugs included and specific pharmacologic opioid minimization strategies examples**

| <b>Class of drugs</b>                | <b>Examples</b>                                                                                    |
|--------------------------------------|----------------------------------------------------------------------------------------------------|
| Anticonvulsants                      | Pregabalin<br>Gabapentin<br>Carbamazepine                                                          |
| Beta-adrenergic antagonist           | Esmolol<br>Metoprolol<br>Labetolol                                                                 |
| Alpha-2 receptor agonist             | Clonidine<br>Dexmedetomidine                                                                       |
| Methylxanthine                       | Caffeine                                                                                           |
| NMDA Receptor Antagonists            | Ketamine<br>Dextromethorphan<br>Magnesium                                                          |
| Corticosteroid/Glucocorticoid        | Dexamethasone<br>Methylprednisolone<br>Hydrocortisone<br>Prednisone                                |
| Antidepressants                      | Amitriptyline<br>Duloxetine<br>Tryptophan<br>Bicifadine<br>Fluoxetine<br>Venlafaxine<br>Citalopram |
| Local Anesthetic                     | Lidocaine                                                                                          |
| Anti-inflammatory (non-NSAID)        | Acetaminophen<br>Nefopam<br>Metamizol                                                              |
| Non opioid central analgesic         | Acetaminophen<br>Nefopam                                                                           |
| Amprone                              | Metamizole                                                                                         |
| Nonsteroidal Anti-inflammatory Drugs | Aspirin                                                                                            |

|                                  |                                                                                             |
|----------------------------------|---------------------------------------------------------------------------------------------|
|                                  | Ketorolac<br>Diclofenac<br>Naproxen<br>Ibuprofen<br>Nabumetone<br>Indomethacin<br>Piroxicam |
| COX-2 specific inhibitor (COXIB) | Celecoxib<br>Rofecoxib<br>Valdecoxib<br>Etoricoxib<br>Lumiracoxib                           |
| Cannabinoid                      | Nabilone<br>Cannabidiol                                                                     |
