# Supplementary material for: Intraoperative pharmacologic opioid minimisation strategies and patient-centred outcomes after surgery: a scoping review protocol
Source: PubMed Central journal article supplement — BMJ Open. 2023 Mar 1;13(3):e070748. doi: 10.1136/bmjopen-2022-070748 (PMC9980324; doi:10.1136/bmjopen-2022-070748), 2023-03-01
Supplement: bmjopen-2022-070748supp003.pdf [file bmjopen-2022-070748supp003.pdf]

**Appendix 3. Interested parties**

| <b>Type of knowledge user</b>            | <b>Interested parties identified</b>                                                            | <b>Role in our scoping review</b>        |
|------------------------------------------|-------------------------------------------------------------------------------------------------|------------------------------------------|
| Practitioners and researchers            | Anesthesiologists<br>Surgeons<br>Nurses<br>Pain expert<br>Psychologist<br>Researcher<br>Trainee | Steering committee and stakeholder group |
| Patients                                 | Patient panel                                                                                   | Steering committee and stakeholder group |
| Patient organization                     | Strategy for Patient-Oriented Research (SPOR)                                                   | Stakeholder group                        |
| Policy makers                            | Health Canada<br>Choosing Wisely                                                                | Stakeholder group                        |
| Institutions                             | Department of Anesthesia and Pain Medicine (University of Ottawa)                               | Stakeholder group                        |
| Interdisciplinary organization           | Pain BC<br>Solving Pain<br>Réseau Québécois de Recherche sur la Douleur<br>Chronic Pain Network | Stakeholder group                        |
| Researcher and practitioner organization | Perioperative Anesthesia Clinical Trials group<br>Canadian Anesthesia Society                   | Stakeholder group                        |
